1 **Title: Machine Learning Reveals Synovial Fibroblast Genes Associated**  
2 **with Pain Affect Sensory Nerve Growth in Rheumatoid Arthritis**

3 **One Sentence Summary:** Machine Learning reveals synovial fibroblast genes related to pain  
4 affect sensory nerve growth in Rheumatoid Arthritis addresses unmet clinical need.

5  
6 **Authors:** Zilong Bai<sup>1</sup>, Nicholas Bartelo<sup>1</sup>, Maryam Aslam<sup>2</sup>, Caryn Hale<sup>2</sup>, Nathalie E. Blachere<sup>2</sup>,  
7 Salina Parveen<sup>2</sup>, Edoardo Spolaore<sup>3</sup>, Edward DiCarlo<sup>3</sup>, Ellen Gravallesse<sup>4</sup>, Melanie H. Smith<sup>3</sup>,  
8 Accelerating Medicines Partnership Program: Rheumatoid Arthritis and Systemic Lupus  
9 Erythematosus (AMP RA/SLE) Network, Mayu O. Frank<sup>2</sup>, Caroline S. Jiang<sup>2</sup>, Haotan Zhang<sup>1</sup>,  
10 Myles J. Lewis<sup>5</sup>, Shafaq Sikandar<sup>5</sup>, Costantino Pitzalis<sup>5,6</sup>, Anne-Marie Malfait<sup>7</sup>, Rachel E.  
11 Miller<sup>7</sup>, Fan Zhang<sup>8</sup>, Susan Goodman<sup>3</sup>, Robert Darnell<sup>2</sup>, Fei Wang<sup>1\*</sup>, Dana E. Orange<sup>2,3\*</sup>

12 **Affiliations:**

13 <sup>1</sup> Weill Cornell Medical College, New York

14 <sup>2</sup> Rockefeller University, New York, NY

15 <sup>3</sup> Hospital for Special Surgery, New York, NY

16 <sup>4</sup> Brigham and Women's Hospital, Boston, MA

17 <sup>5</sup> Queen Mary University of London, United Kingdom

18 <sup>6</sup> Department of Biomedical Sciences, Humanitas University & IRCC Humanitas Research  
19 Hospital, Milan, Italy

20 <sup>7</sup> Rush University Medical Center, Chicago, IL

21 <sup>8</sup> University of Colorado, Anschutz, CO

22

23 \*Corresponding Authors

24 Fei Wang

25 Department of Population Health Sciences

26 Weill Cornell Medicine

27 425 East 61<sup>th</sup> Street

28 New York, NY, 10065

29 646-962-9405

30 few2001@med.cornell.edu

31

32 Dana E. Orange

33 Rockefeller University

34 1230 York Avenue

35 New York, NY, 10065

36 917-439-9625

37 dorange@rockefeller.edu

38

39 **Abstract:** It has been presumed that rheumatoid arthritis (RA) joint pain is related to  
40 inflammation in the synovium; however, recent studies reveal that pain scores in patients do not  
41 correlate with synovial inflammation. We identified a module of 815 genes associated with pain,  
42 using a novel machine learning approach, Graph-based Gene expression Module Identification  
43 (GbGMI), in samples from patients with longstanding RA, but limited synovial inflammation at  
44 arthroplasty, and validated this finding in an independent cohort of synovial biopsy samples from  
45 early, untreated RA patients. Single-cell RNA-seq analyses indicated these genes were most

46 robustly expressed by lining layer fibroblasts and receptor-ligand interaction analysis predicted  
47 robust lining layer fibroblast crosstalk with pain sensitive CGRP+ dorsal root ganglion sensory  
48 neurons. Netrin-4, which is abundantly expressed by lining fibroblasts and associated with pain,  
49 significantly increased the branching of pain-sensitive CGRP+ neurons *in vitro*. We conclude  
50 GbGMI is a useful method for identifying a module of genes that associate with a clinical feature  
51 of interest. Using this approach, we find that Netrin-4 is produced by synovial fibroblasts in the  
52 absence of inflammation and can enhance the outgrowth of CGRP+ pain sensitive nerve fibers.

### 53 **Main Text:**

## 54 **INTRODUCTION**

55 The four classic signs of inflammation are rubor, tumor, calor, and dolor – or redness, swelling,  
56 warmth, and pain. Inflammatory pain can be driven by cytokines, bradykinins, and prostanoids,  
57 which bind specific receptors on primary sensory neurons to cause heightened sensation of pain  
58 (1). Clinically, pain is not always proportional to inflammation and clinical scenarios in which  
59 pain is dissociated from inflammation are useful to study the non-inflammatory drivers of pain.

60  
61 Rheumatoid arthritis (RA) is a chronic disease characterized by inflammation in the synovium, the  
62 tissue that lines the joint cavity. Despite great progress in developing an array of conventional  
63 synthetic, targeted synthetic, and biologic disease-modifying anti-rheumatic drugs (csDMARDs,  
64 ctDMARDs, and bDMARDs), which target relevant immune mediators (2), up to 20% of patients  
65 with RA are “difficult-to-treat”, that is they do not improve despite treatment with at least two  
66 bDMARD or tsDMARDs, with different mechanisms of action, after failing a csDMARD (3) It  
67 has been assumed that synovial inflammation is the cause of RA joint pain, however, recent studies  
68 have revealed that pain can be dissociated from inflammation in RA (4-8). Patients with RA and

69 limited synovial inflammation, also known as “fibroid”, “low inflammatory” or “pauci-immune”  
70 synovium have as much pain as those with extreme inflammation (9-11). Patients with low  
71 inflammatory synovium tend to receive less benefit from treatment with anti-inflammatory drugs  
72 such as TNF inhibitors and disease-modifying anti-rheumatic drugs (DMARDs) (12,13), making  
73 their management particularly challenging for clinicians, and suggesting that traditional  
74 inflammatory pathways may not be the source of their discomfort.

75  
76 Here, we performed a focused analysis on low inflammatory synovium to identify factors, beyond  
77 inflammation, that relate to and might mediate joint pain. Due to the small number of patients  
78 limiting the statistical power and patient reported outcome data being notoriously noisy, no  
79 existing machine learning approach is adequately powered to identify pain-associated gene  
80 modules from RA patients with low synovial inflammation. We developed a novel Machine  
81 Learning approach, called Graph-based Gene expression Module Identification (GbGMI). Using  
82 GbGMI, we discovered a group of 815 genes associated with pain in samples from patients with  
83 established RA but low synovial inflammation. We validated the pain-associated gene module on  
84 internal data and a second dataset of patients with early RA. Using sorted-cell subsets and single-  
85 cell RNA-seq data, we determined that lining fibroblasts express the majority of these pain-  
86 associated genes and, of these, we focused on genes predicted to interact with dorsal root ganglion  
87 sensory nerves. This led to the discovery that synovial lining fibroblasts produce Netrin-4 (Net4  
88 or NTN4), which significantly augments branching of pain-sensitive CGRP+ sensory nerves *in*  
89 *vitro*. This work provides a novel approach to relate gene expression data to clinical data, uncovers  
90 a role for synovial fibroblast production of Netrin-4 in peripheral sensitization in RA, and

91 nominates a panel of other targets that warrant additional study for their potential role in joint pain  
92 (Fig. S1).

93

## 94 **RESULTS**

### 95 **Pain is not related to inflammation in RA patients with low inflammatory synovium**

96 We categorized patients as high or low inflammatory using our previously reported histology  
97 scoring algorithm (9). Consistent with our prior studies, RA pain scores were not different  
98 between patients with high and low inflammatory synovium (Fig. 1A). Pain scores were  
99 associated with the level of synovial inflammation as measured by the density of cells per unit of  
100 tissue (cells/mm<sup>2</sup>) in patients with high inflammatory synovium, but not in patients with low  
101 inflammatory synovium (Fig. 1B).

### 102 **GbGMI-identification of pain-associated synovial gene expression in patients with** 103 **established RA**

104 We first tested for genes that were significantly associated with pain using the usual RNA-seq  
105 analysis platform, limma (14). We failed to identify any significant individual genes that were  
106 correlated with pain suggesting the relationship of gene expression with pain could be  
107 multifactorial or nonlinear. We next hypothesized there might be groups of genes whose  
108 expression varies in association with pain. We developed an iterative machine-learning Graph-  
109 based Gene expression Module Identification (GbGMI) computational framework to uncover a  
110 group of genes whose expression is correlated with a given univariate clinical feature. Given a  
111 multi-modal input comprising a gene expression matrix  $M$  for  $m$  genes and  $n$  patients and an  $n$ -  
112 dimensional clinical feature vector  $a$ , GbGMI calculates the patient-to-patient similarity structure

113 according to the given clinical feature, compares that to the gene expressions using the Laplacian  
114 score, and then determines the optimal number of genes that together associate with the clinical  
115 feature through statistical tests between the t-SNE-based summary scores of the selected genes and  
116 this clinical feature (see Materials and Methods. Fig. S2).

117  
118 We first benchmarked this GbGMI approach by testing whether it would correctly identify genes  
119 known to be associated with inflammation as measured by cell density, which is associated with  
120 many significant individual genes as measured by limma (14). GbGMI identified a module of  
121 2,713 genes whose gene expression summary score correlates with synovial tissue cell density  
122 (Fig. 2A-D). The positive control for this analysis was principal component one (PC1) of bulk  
123 synovial RNA-seq gene expression data, which was previously shown to associate with the extent  
124 of synovial inflammation and correlate significantly with synovial cell density (15), while the  
125 negative control was a gene expression summary score for a group of the top 5,000 most variably  
126 expressed genes. As expected, PC1 scores of gene expression were significantly correlated with  
127 synovial histologic cell density (Spearman  $\rho=0.4$ ,  $p=0.01$ ) (Fig. 2F) while the gene expression  
128 summary score of the top 5000 most variably expressed genes were not ( $p=0.21$ ) (Fig. 2E). The  
129 gene expression summary score of the GbGMI module of 2,713 genes had a further improved  
130 correlation to synovial histologic cell density (Spearman  $\rho=0.59$ ,  $p=0.0001$ ) (Fig. 2G). Taken  
131 together, this analysis indicates that GbGMI is a useful method that outperformed PCA in  
132 identifying a module of genes that associate with the clinical feature of interest, synovial  
133 inflammation as measured by cell density.

134

135 We next applied GbGMI to define a module of genes associated with pain in patients with low  
136 inflammatory synovium. The majority of the 6,582 genes that distinguish high and low  
137 inflammatory synovium are increased in high inflammatory synovium and are enriched for  
138 pathways representing infiltrating immune cells. To uncover genes associated with pain, but not  
139 inflammation, we focused our analysis on 2,227 genes that were significantly increased in low  
140 inflammatory synovium relative to high inflammatory synovium (9) and on pain scores that  
141 document the extent of pain in the joint that was sampled (Hip Osteoarthritis Outcome  
142 Score/Knee Osteoarthritis Outcome Score (HOOS/KOOS) (Fig. 3A). The patient-reported pain  
143 scores  $a$  were transformed into a matrix of pairwise similarity scores between patients  $S$  (Fig.  
144 3B). We next calculated the Laplacian score (16) for each of the 2,227 low-inflammatory genes  
145 based on its expression values (i.e., a row vector in  $M$ ) and  $S$  (Fig. 3C). We then tested which  
146 number of top-ranked genes collectively best correlated with pain among RA patients with low  
147 synovial inflammation and identified an 815-gene module, which we refer to as the GbGMI-  
148 identified pain-associated genes (Fig. 3D). Although the summary score of all 2,227 low  
149 inflammatory genes did not correlate with pain, summary scores of the GbGMI-identified pain-  
150 associated genes were significantly correlated with the patient-reported HOOS/KOOS pain in  
151 patients with low inflammatory synovium (Fig. 3E). This correlation was not as pronounced  
152 when including all RA patients irrespective of inflammatory subset (Fig. 3F). Similar  
153 correlations were identified when the GbGMI-identified pain-associated genes were compared to  
154 Visual Analog Scores (VAS) report of pain (Fig. S3).

### 155 **GbGMI-identified pain-associated synovial gene expression in patients with early RA**

156 Overfitting is a concern in using a graph-based machine-learning approach to identify groups of  
157 genes that associate with pain. It is possible that the GbGMI-identified pain-associated genes

158 correlate with pain in the dataset in which they were discovered, but not in other external  
159 datasets. We next sought to test whether the pain-associated gene module identified in patients  
160 with established disease was also associated with pain in a second, independent Pathobiology of  
161 Early Arthritis Cohort (PEAC) dataset (10) of synovial biopsy samples from patients with early  
162 (mean of 6 months of symptoms), untreated, RA. 2,018 of the 2,227 low inflammatory genes and  
163 738 of the 815 pain-associated genes discovered in the established RA were also measured in  
164 this dataset. The 738 GbGMI-identified pain-associated genes were also significantly correlated  
165 with Visual Analog Score (VAS) pain in patients with early RA with low (fibroid or undefined)  
166 inflammatory synovium (Fig. 3G), while the 2,018 low-inflammatory genes were not. In this  
167 early RA cohort, the 738 GbGMI-identified pain-associated genes were also associated with pain  
168 in all patients, irrespective of synovial inflammatory subset, as well, though the association was  
169 again not as robust as was seen in those with low inflammatory synovium (Fig. 3H). Of note, the  
170 range of GbGMI summary scores decreased when all samples were included. The association of  
171 the GbGMI-identified genes with pain was robust in the low inflammatory samples, but persisted  
172 even when all patients were included, suggesting that these genes may play a role, albeit less  
173 pronounced, in pain in high inflammatory synovium, where inflammatory mediators are highly  
174 likely to also contribute.

175 **GbGMI-identified pain-associated genes are enriched with neurogenesis pathways and**  
176 **predominantly expressed by synovial fibroblasts**

177 We next sought to understand the biological meaning and the direction of the association of the  
178 815 GbGMI genes with pain in RA patients with low synovial inflammation. Limma was  
179 performed to detect genes whose expression correlates with pain and genes were ranked by  
180 limma according to this correlation. Of note, though limma did not identify any significant (FDR



181 <0.05) individual genes correlated with pain (Fig. S4A), as a group, expression of the 815  
182 GbGMI-identified pain genes was significantly decreased as the HOOS/KOOS pain score  
183 increased (adjusted p-value: 7.38e-12 (ks.test) (Fig. S4B and S4C), indicating a positive  
184 correlation with pain severity. The 815 pain-associated genes included ephrin (EPHA3, EPHA6,  
185 EPHA7) and semaphorin (SEMA3B, SEMA3E, SEMA4C, SEMA5A, SEMA6D) family  
186 members and were significantly enriched in nervous system development and neuron projection  
187 pathways. On the other hand, the 1,412 non-pain associated genes included CD55, PRG4,  
188 CSPG4, MERTK, genes known to be involved in the normal functions of lining macrophages  
189 and fibroblasts (17), and were enriched in molecular function and rRNA processing, but not  
190 neuron projection pathways (Fig. 4A). We next examined which cells express the GbGMI pain-  
191 associated genes by comparing their expression in sorted bulk synovial B cells, fibroblasts,  
192 monocytes, and T cells, which offers high depth coverage of RNA but less cell type resolution,  
193 and sorted single cells, which offers higher cell type resolution to cell subtypes but less depth of  
194 coverage, from the Accelerating Medicines Partnership dataset (18). Comparison of the pain-  
195 associated genes across sorted bulk synovial B cells, fibroblasts, monocytes, and T cells  
196 indicated fibroblasts express the highest levels of pain-associated genes (Fig. 4B and 4C). We  
197 reasoned pain associated genes might be more robustly expressed in fibroblasts because of a  
198 relative enrichment in fibroblasts, compared to immune cells, in low-inflammatory samples.  
199 However, when looking only at fibroblasts, the pain-associated genes were significantly  
200 increased compared to the non-pain associated genes (Fig. 4B). The marked differences in  
201 pathways enriched in pain-associated and non-pain associated genes as well as the difference in  
202 relative expression levels within fibroblasts indicates the GbGMI method did not select a random  
203 group of fibroblast genes. Further analysis of the single cell RNA-seq dataset also confirmed that

204 the fibroblast subsets express the highest levels of pain-associated genes (Fig. 4D). Gene  
205 expression analysis among fibroblast subsets indicated that, compared to the other fibroblast  
206 subsets, lining CD55+ fibroblasts (SC-F4) express the highest level of GbGMI-identified pain-  
207 associated genes (Fig. 4E). Taken together, these analyses indicate GbGMI-identified pain  
208 associated genes are expressed by synovial fibroblasts and enriched for neurogenesis pathways.

### 209 **Predicted interactions between lining fibroblasts and dorsal root ganglion neurons**

210 Given the pain-associated genes were enriched in neuron projection pathways, we next explored  
211 predicted interactions of pain-associated synovial fibroblast genes with dorsal root ganglion  
212 (DRG) sensory neurons, which contain the soma of synovial innervating nociceptive neurons.  
213 We performed receptor-ligand interaction analysis to identify predicted receptor-ligand pairs  
214 using the pain-associated genes expressed by four synovial fibroblast subtypes in human RA  
215 synovial tissue and genes expressed in a human DRG bulk RNA-seq dataset (19, 20). Lining  
216 fibroblasts (SC-F4) were predicted to have the highest number of ligand-receptor interactions (57  
217 SC-F4 ligands to hDRG receptors) (Fig. 5A and 5B). To further clarify which types of DRG  
218 nerves might be predicted to interact with synovial fibroblasts, we also performed receptor-  
219 ligand interaction analysis between the pain-associated genes expressed by the synovial  
220 fibroblast subsets (18) and a mouse scRNA-seq DRG dataset (21). Again, lining fibroblasts (SC-  
221 F4) were predicted to have the highest number of receptor-ligand interactions and were predicted  
222 to interact with proprioceptors, as well as A-b, A-d and CGRP peptidergic neurons (Fig. 5C and  
223 table S3). Comparison of the expression of 21 ligand or receptor encoding pain-associated genes  
224 of SC-F4 revealed a gradient of pain-associated genes that are relatively lowly expressed in SC-  
225 F1 cells and most highly expressed in SC-F4 cells, with HBEGF, CTGF, and NTN4 among the  
226 most robustly expressed (Fig. 5D).

227 **Products of synovial fibroblasts influence adult dorsal root ganglion sprouting and**  
228 **branching in response to injury**

229 We next sought to test whether any of the pain-associated synovial fibroblast genes, discovered  
230 in this analysis, might directly influence the growth of pain sensitive neurons in the synovium.  
231 Unmyelinated, small, CGRP+ nerve fibers are responsible for pain transmission and can be  
232 found in the synovium extending up to the lining layer (22), indicating synovial lining fibroblast  
233 interaction with CGRP+ nociceptive fibers could take place within relatively close range. While  
234 pathway analysis indicated many of the pain associated genes are associated with neurogenesis,  
235 the majority of this data was defined in studies of the central nervous system of developing  
236 embryos of model organisms, not adult human diseased joint tissue. *NTN4* was of interest  
237 because it was associated with pain in this dataset and is highly expressed by synovial  
238 fibroblasts. Netrin-4 (*NTN4* or *Net4*) is a secreted member of the netrin family of proteins, of  
239 which, Netrin-1, is the first discovered and best described for its role as an axon attractant during  
240 embryogenesis (23). Though *Net4* has only 30% sequence homology to Netrin-1, it has been  
241 shown to augment embryonic olfactory bulb sprouting and thalamocortical branching (24–26). It  
242 is not known whether or how Netrin-4 might influence injured adult DRG CGRP+ pain sensitive  
243 neurons. We cultured adult mouse dissociated DRG neurons with either no supplements, nerve  
244 growth factor (Ngf), as a positive control, since it is known to produce robust effects on axon  
245 sprouting (27,28), or *Net4*, and measured survival, sprouting, and branching of CGRP+ DRG  
246 neurons. CGRP status of the DRG neurons was assigned using immunofluorescent stains (Fig.  
247 S4). While there was no effect of either Ngf or *Net4* on CGRP+ neuron survival (Fig. 6A), or  
248 sprouting (Fig. 6B), compared to untreated CGRP+ neurons, *Net4* significantly augmented  
249 branching *in vitro* (Fig. 6B).

250 **DISCUSSION**

251 Using our newly developed GbGMI approach, we discovered a module of 815 genes, whose  
252 expression correlates with patient report of pain and are enriched in neuron projection pathways.  
253 These pain-associated genes are most robustly expressed by lining layer fibroblasts. The proteins  
254 encoded by these pain-associated genes include netrins, semaphorins, and ephrins, proteins that  
255 ensure neurons and their axons develop in the correct stages and places required for normal  
256 nervous system development. Human knee innervating sensory neurons extend their  
257 pseudounipolar axons approximately one meter from their origin in the DRG to their destination  
258 in the joint. A complex interplay of multiple molecules at distinct concentrations attract or repel  
259 neurons to tune their projections in space and time during development (29). Our findings that  
260 RA synovial fibroblasts express an array of neural guidance genes that associate with patient  
261 report of pain and augment CGRP+ nociceptor growth *in vitro* are consistent with recent studies  
262 in osteoarthritis (OA), which identified aberrant CGRP+ sensory neurite sprouting into normally  
263 aneural cartilage (30-33). While RA tends to affect all three knee compartments similarly, OA  
264 tends to affect the medial side more severely. Compared to synovial fibroblasts from the  
265 nonpainful side, synovial fibroblast conditioned media from the painful side of knee OA  
266 increased neuron survival and longest branch length *in vitro* (34). Our studies suggest there may  
267 be a mechanism, in both RA and OA, by which synovial fibroblasts can play a role in mediating  
268 joint pain. Our studies also led to the discovery that Netrin-4, which has been shown to affect  
269 thalamocortical axon sprouting in embryogenesis(26), augments branching of injured pain-  
270 sensitive CGRP+ nerves *in vitro*. Netrin-4 binds the extracellular matrix molecule, laminin,  
271 specifically laminin  $\gamma$ 1, encoded by the gene LAMC1, and in doing so, dramatically weakens  
272 matrix stiffness (25). Laminins are large glycoproteins that are abundant in synovium and

273 LAMA4 and LAMC1 expression are increased in RA synovium. It is possible that a compliant  
274 extracellular matrix facilitates CGRP+ neurite sprouting or branching. Netrin-4 also binds cell  
275 surface receptors, such as Unc5B (26), which are expressed on several dorsal root  
276 ganglion. Avenues for future research include *in vivo* animal studies to test the function of  
277 NTN4, as well as other identified pain-associated genes, and explore their potential in drug or  
278 treatment design.

279 It is worth noting that there are many other genes associated with patient report of pain in this  
280 dataset that warrant additional study such as HBEGF, BTC, and CTGF, which augment neuronal  
281 sprouting in response to injury and have been used to treat pathological pain alleviation in other  
282 clinical scenarios (35,36). In addition, neural guidance molecules also have important functions  
283 outside the nervous system, such as affecting angiogenesis, lung branching morphogenesis,  
284 immunomodulation, and tumorigenesis, and these non-neuronal effects of this family of  
285 molecules warrant further study in the context of arthritis.

286 In summary, here we present GbGMI, a feature-selection method that can be used to identify  
287 pathology-specific multi-gene signatures by exploiting patient-to-patient similarity structures in  
288 different feature spaces when the number of patients is limited. We used GbGMI to identify  
289 pain-associated genes expressed by synovial fibroblasts in low-inflammatory RA synovial  
290 tissues, leading to the discovery that synovial fibroblast-sensory neuron crosstalk may relate non-  
291 inflammatory joint pain and providing an avenue to pursue novel targets for the management of  
292 joint pain.

## 293 **MATERIALS AND METHODS**

### 294 **Study Approval**

295 This study includes data from 102 RA patients undergoing arthroplasty at the Hospital for  
296 Special Surgery (HSS) in New York. All patients met either the American College of  
297 Rheumatology (ACR)/European League Against Rheumatism 2010 Classification criteria (37)  
298 and/or the ACR 1987 criteria for RA. Patient data including Knee disability and Osteoarthritis  
299 Outcome Score (KOOS) (38) and Hip disability and Osteoarthritis Outcome Score (HOOS) (39)  
300 questionnaire were collected. RA pain scores indicate response to the question “How much pain  
301 have you felt due to your rheumatoid arthritis during the last week?”, with responses ranging  
302 from 1 to 10. Condition pain scores indicate response to the question, “How much pain have you  
303 had because of your condition OVER THE PAST WEEK? Please indicate how severe your pain  
304 has been” with responses ranging from 1 to 10. This study was approved by the HSS Institutional  
305 Review Board (approval no. 2014-233), the Rockefeller University Institutional Review Board  
306 (approval no. DOR0822), and the Biomedical Research Alliance of New York (approval no. 15-  
307 08-114-385). All participating patients provided their signed informed consent.

### 308 **H&E Histologic Scoring**

309 Synovial samples were obtained from the most grossly inflamed (dull and opaque) area of  
310 synovium. If there were no obviously inflamed areas, samples were obtained from standard  
311 locations: the femoral aspects of the medial and lateral gutters and the central supratrochlear region  
312 of the suprapatellar pouch. Each tissue biopsy was sectioned at 5-micrometer thickness and stained  
313 with Harris modified hematoxylin solution and eosin Y (H&E) manufactured by EpreDia in  
314 Kalamazoo, MI. An expert musculoskeletal pathologist scored fourteen synovial histologic  
315 features in a single section for each patient: lymphocytic inflammation, mucoid change, fibrosis,  
316 fibrin, germinal centers, lining hyperplasia, neutrophils, detritus, plasma cells, binucleated plasma  
317 cells, Russell bodies, sub-lining giant cells, synovial lining giant cells, and mast cells. Detailed

318 methods for scoring these features are described in prior studies (9,40) and available at  
319 [www.hss.edu/pathology-synovitis](http://www.hss.edu/pathology-synovitis), the classification algorithm is available at Immport  
320 [www.immport-open/public/study/displayStudyDetail/SDY1299](http://www.immport-open/public/study/displayStudyDetail/SDY1299).

### 321 **Gene Expression Established Arthritis Cohort**

322 RNA was extracted from 39 bulk synovial tissue samples collected from an established RA  
323 cohort and previously sequenced as described in (41) (ImmPort Accession #SDY1299). In brief,  
324 these libraries were prepared using TruSeq messenger RNA (mRNA) Stranded Library kits, 50-  
325 bp paired-end reads were sequenced on a HiSeq2500 platform, and reads were aligned to hg19  
326 using STAR (42). Samples with >0.1% globin mRNA were excluded from further analysis. After  
327 quality control, ComBat in the Bioconductor SVA package (43) was used for batch effect  
328 correction, and DESeq2 (44) was used to normalize the data. Consensus clustering identified  
329 three gene expression clusters characterized by different levels of synovial inflammation: low  
330 (n=14), intermediate (n=11), and high (n=14) (9). Of these 39 RA patients, 38 had mean nuclei  
331 density data for the benchmarking analysis (15), and 26 had low inflammatory synovium, for  
332 which all 26 had scores for lymphocytic inflammation and lining hyperplasia and 22 had scores  
333 of fibrosis and HOOS/KOOS pain scores. We used limma (14) to test for gene expression  
334 correlates of fibrosis, lymphocytic inflammation, lining hyperplasia and pain.

### 335 **Gene-set enrichment analysis (GSEA)**

336 A moderated t-test was performed between each gene expression profile and the pain scores over  
337 the subset (n=22) low-inflammatory patients. The resulting log<sub>2</sub> fold-change therefore offers a  
338 score of correlation between the expression of each gene and the pain. The moderated t-statistic  
339 (ratio of log<sub>2</sub>-fold change to its standard error) was used to rank the genes. The fgsea R package  
340 (45) was used for enrichment analysis of the GbGMI-identified subset (n=815) of genes

341 associated with pain as well as the set of marker genes for each of the 18 synovial cell  
342 subpopulations (200 marker genes per subpopulation) (*11,18*) (ImmPort Accession #SDY998).  
343 Since the HOOS/KOOS pain scores are from 0 (worst joint health) to 100 (best joint health)  
344 (*38,39,46*), a gene set more correlated to the bottom of the list hence negatively correlated with  
345 HOOS/KOOS pain scores, indicating positive correlation with pain.

### 346 **Gene Expression Early Arthritis Cohort**

347 For external validation of the pain-associated genes identified by our method, we downloaded the  
348 bulk RNA-seq of early RA patients from the Pathobiology of Early Arthritis Cohort (PEAC) on  
349 ArrayExpress (<https://www.ebi.ac.uk/arrayexpress/experiments/E-MTAB-6141/samples/>)  
350 Using only sample with sufficient data quality, reads were pseudoaligned to hg38 with Kallisto  
351 in order to generate a counts matrix. Counts were normalized for read depth (counts into  
352  $\log_2(\text{CPM}+1)$  (Counts Per Million)) and batch corrected using `removeBatchEffect` from `limma`.

### 353 **Gene Expression in bulk sorted cells and single cells**

354 In the analyses related to RA synovial cell types, we used the sorted-population bulk RNA-seq  
355 gene expression data of the synovial T cells (CD45+, CD3+, CD14-), monocytes (CD45+, CD3-  
356 , CD14+), B cells (CD45+, CD3-, CD14-, CD19+), and fibroblasts (CD45-, CD31-, PDPN+)  
357 collected by fluorescence activated cell sorting (BD FACSAria Fusion) directly in buffer RLT  
358 (Qiagen) (*11,18*). Normalized read counts per gene as transcripts per million (TPMs) were used  
359 (ImmPort Accession #SDY998) (*11*).

360

361 We used the single-cell RNA-seq data preprocessed by (*18*), where the gene expression levels  
362 were quantified by counting UMIs (Unique Molecular Identifiers) and transformed into



363  $\log_2(\text{CPM} + 1)$ . From the scRNA-seq profiles for 32,391 genes and 5,265 cells left after rigorous  
364 quality control, 18 unique cell populations were identified by an integrated strategy based on  
365 canonical correlation analysis. Specifically, in fibroblasts: CD34+ sublining fibroblasts (SC-F1),  
366 HLA-DRAhi sublining fibroblasts (SC-F2), DKK3+ sublining fibroblasts (SC-F3), and CD55+  
367 lining fibroblasts (SC-F4); in monocytes: IL1B+ pro-inflammatory monocytes (SC-M1),  
368 NUPR1+ monocytes (SC-M2), C1QA+ monocytes (SC-M3), and interferon (IFN) activated  
369 monocytes (SC-M4); in T cells: three CD4+ clusters: CCR7+ T cells (SC-T1), FOXP3+  
370 regulatory T cells (Treg cells) (SC-T2), and PDCD1+ TPH and TFH (SC-T3) cells, and three  
371 CD8+ clusters, GZMK+ T cells (SC-T4), GNLY+GZMB+ cytotoxic lymphocytes (CTLs) (SC-  
372 T5), and GZMK+GZMB+ T cells (SC-T6); in B cells: naïve IGHD+CD27- (SC-B1),  
373 IGHG3+CD27+ memory B cells (SC-B2), autoimmune-associated B cell (ABC) cluster (SC-B3)  
374 with high expression of ITGAX (also known as CD11c) and a plasmablast cluster (SC-B4) with  
375 high expression of immunoglobulin genes and XBP1 (18). The top 200 marker genes for each  
376 subpopulation identified by differential expression analysis in the original publication (18) were  
377 used as signature genes for individual cell-types within RA synovium.

### 378 **Description of our Graph-based Gene expression Module Identification (GbGMI)** 379 **framework**

380 We developed GbGMI, a graph-based machine learning framework of algorithms, to identify a  
381 gene expression module that strongly correlates with pain in low-inflammatory RA synovial  
382 tissues (Fig. S2). We use  $M \in R^{m \times n}$  to represent the input gene expression matrix of genes and  
383 patients. We use a numeric vector  $a \in R^n$  to represent the pain scores reported by these patients.  
384 We quantified the quality  $Q$  of a selected gene subset via the correlation between their collective  
385 expression and the pain score, and then searched for a gene subset with optimal quality  $Q$  as a

386 feature selection task (47–50). As exhaustive search through all possible subsets of an input gene  
387 set to optimize  $Q$  is computationally intractable (51), we adapted and integrated the feature  
388 scoring strategy used in the filter feature-selection/ranking approaches (52–54) and the feature  
389 subset scoring strategy used in the wrapper feature-selection approaches (50,55). Specifically, we  
390 generated a gene prioritization list  $\mathcal{L}_S$  according to how well each individual gene expression  
391 respects the geometric structure over patients built according to their pain scores. Then, the  
392 quality  $Q_k$  of the  $k$ -th candidate gene subset comprising the top  $k$  genes in  $\mathcal{L}_S$  is evaluated, for  $k$   
393 ranging from 1 to  $m$ . The first  $k^*$  where  $Q_k$  peaked is used as the cut-off point on  $\mathcal{L}_S$ . This  
394 subset of  $k^*$  genes is the output pain-associated gene module.

395

396 ***Gene prioritization with adapted Laplacian Score algorithm.*** (16) Given the input gene  
397 expression matrix and pain-score vector, we ranked the genes by the way each gene expression  
398 vector (i.e., a row vector in the gene expression matrix  $M$ ) respected a given geometric structure  
399 over the patients encoded in an  $n \times n$  similarity matrix  $S$  based on the pain score vector  $a$   
400 instead of assuming independent observations in the correlation tests (Fig. S2, step A). To  
401 compute  $S$ , a Gaussian kernel, which empirically outperformed other types of kernels (56,57),  
402 was adopted to map the Euclidean distance between the pain scores of each pair of patients and  
403 into a similarity measure  $S(i, j) \in [0,1]$ :

$$S(i, j) = e^{-\frac{|a(i) - a(j)|^2}{h}} \quad (1)$$

404 where  $h$  corresponds to the bandwidth or smoothing factor in a kernel metric definition. This  
405 formulation forces the similarity measure between any two patients with significantly different  
406 pain scores to be close to 0, while pushing the similarity measure between the patients of pain  
407 scores within a certain range (depending on the smoothing factor) to be closer to 1. This

408 promotes the *locality* we want to focus on. We set  $h$  to control the local neighborhood of  
409 patients on graph  $S$  according to the theoretical range of the pain scores (e.g.,  $h = 100$  for HSS  
410 HOOS/KOOS pain score or PEAC VAS characteristic since either ranges between 0 and 100).  
411  
412 The Laplacian Score of each gene is then computed to evaluate how well this gene's expression  
413 on these patients preserves  $S$ . (Fig. S2, step B.) This is different from the original publication  
414 (16,58) which aimed to preserve the input feature space (e.g., the input low-inflammatory genes),  
415 wherein we aim to select features (e.g., the  $k^*$  pain-associated genes). The Laplacian matrix of  $S$   
416 is defined by  $L = D - S$ , where  $D$  is a diagonal matrix with  $D_{ii}$  indicating the degree of node  
417 (i.e., patient)  $i$  in the weighted graph  $S$  (i.e.,  $D = \text{diag}(S \mathbf{1})$ ). For the  $r$ -th gene, let  $M_{r,*}$  be its  $n$ -  
418 dimensional gene expression vector across the patients (i.e., the  $r$ -th row vector in the gene  
419 expression matrix  $M$ ), its Laplacian Score  $ls(r)$  is computed as:

$$ls(r) = \frac{\widehat{m}_r^T L \widehat{m}_r}{\widehat{m}_r^T D \widehat{m}_r}, \widehat{m}_r = M_{r,*}^T - \frac{M_{r,*} D \mathbf{1}}{\mathbf{1}^T D \mathbf{1}} \mathbf{1} \quad (2)$$

420 where the symbol  $\mathbf{1}$  denotes a column vector whose all elements are 1's with dimensionality  
421 determined by context. The gene prioritization list  $\mathcal{L}_S$  is generated by sorting the input  $m$  genes  
422 according to their Laplacian Scores in ascending order. The smaller the Laplacian Score of a gene,  
423 the better its expression data respect the geometric structure defined by  $S$  over the patients  
424 (according to objective function analysis (16)). Each top- $k$  subset on  $\mathcal{L}_S$  forms a candidate gene  
425 subset for selection. The rows of  $M$  were reordered according to  $\mathcal{L}_S$ . (Fig. S2, step C.)

426  
427 **Quantification of candidate  $k$ -gene subset quality  $Q_k$ .** The  $Q_k$  of the  $k$ -th candidate gene subset  
428 is measured based on the association between their collective expression pattern and the pain-

429 score vector  $a$ . Given the gene expression submatrix  $M_{1:k,*}$  of this candidate  $k$ -gene subset,  $Q_k$  is  
430 computed through two steps: Firstly, project the  $k$ -gene expression vector of each patient into a  
431 univariate summary score that preserves the patient-to-patient similarity structure in the original  
432  $k$ -dimensional feature (gene) space. This addresses the dimensionality mismatch between the  
433 multi-gene expression and the univariate patient-level pain score (9). The resulting summary  
434 score vector of the  $n$  patients is denoted  $s_k$ . (Fig. S2, step D.) Secondly, quantify  $Q_k$  by using  
435 the statistical significance of correlation test (e.g., the  $-\log(p\text{-value})$  of Kendall's correlation  
436 test) between  $s_k$  and  $a$  over the same patients. We chose the first  $k^*$ , where  $Q_{k^*}$  peaked, as the  
437 cut-off point on the sorted gene prioritization list  $\mathcal{L}_g$ . This subset of  $k^*$  genes is the pain-  
438 associated gene module identified by our GbGMI framework. (Fig. S2, step E.)

439  
440 For Fig. S2, step D, We used the t-distributed Stochastic Neighborhood Embedding (t-SNE)  
441 (57). The resulting summary score vector  $s_k$  for the  $n$  patients respect how the gene expression  
442 data was arranged in the  $k$ -gene feature space of this candidate gene subset. We hereon briefly  
443 sketch the instantiation of t-SNE with the variables involved in our study. Following the SNE  
444 framework (59), the directional similarity of patient  $j$  to patient  $i$  based on their multi-gene  
445 expression vectors  $M_{1:k,i}$  and  $M_{1:k,j}$  is :

$$p(j|i) = \frac{\exp(-\|M_{1:k,i} - M_{1:k,j}\|^2/2\sigma_i^2)}{\sum_{l \neq i} \exp(-\|M_{1:k,i} - M_{1:k,l}\|^2/2\sigma_i^2)} \quad (3)$$

446  
447 where the variance of the Gaussian kernel  $\sigma_i^2$  is chosen such that the perplexity of the  
448 conditional probability distribution over all points  $j \neq i$  defined by

$$Perp(P_i) = 2H(P_i), H(P_i) = -\sum_j P(j|i) \log_2 p(j|i) \quad (4)$$

449  
450 matches a pre-specified value. The perplexity in this context can be interpreted as an estimation  
451 about the number of close neighbors of each patient on graph  $S$ . Therefore, we specify the  
452 perplexity based on the rounded mean degree of the similarity graph  $S$  built from  $a$ . The  
453 symmetric SNE was used for mathematical and computational convenience in the t-SNE  
454 formulation by defining the following undirected similarities:

$$p(i, j) = \frac{p(j|i) + p(i|j)}{2n} \quad (5)$$

455  
456 where  $n$  is the number of patients. Since  $\sum_{i,j} p(i, j) = 1$ , this is a valid probability distribution  
457 on the set of all pairs  $(i, j)$ . The t-SNE step in this algorithm uses the t-distribution with one  
458 degree of freedom (also known as Cauchy distribution) as the one-dimensional similarity kernel  
459 applied to pairs of summary scores defined by:

$$q(i, j) = \frac{(1 + \|s(i) - s(j)\|^2)^{-1}}{\sum_{k \neq i} (1 + \|s(k) - s(i)\|^2)^{-1}} \quad (6)$$

460 The main idea of this t-SNE-based step is to arrange the patients in a one-dimensional space such  
461 that the similarities  $q(i, j)$  between  $s(i)$  and  $s(j)$  match  $p(i, j)$  as close as possible in terms of  
462 the Kullback-Leibler (KL) divergence. Thus the loss function is:

$$L = \sum_{i,j} p(i, j) \log \frac{p(i, j)}{q(i, j)} \quad (7)$$

463  
464 A summary score vector  $s_k$  is computed for each candidate  $k$ -gene subset, rendering a set of  $m$   
465 such vectors  $\{s_k | k = 1, 2, \dots, m\}$ .

466

467 Our framework GbGMI can be applied to identify a subset of genes that collectively associate  
468 with some other patient-level numeric attribute beyond the main focus of this paper (the  
469 HOOS/KOOS pain score). Our framework is also flexible and adaptive in different contexts by  
470 replacing specific computational components with other design choices (e.g., other embeddings  
471 instead of t-SNE for computing summary scores of selected gene expression).

## 472 **Pathway Enrichment Analysis**

473 We used g:Profiler (<https://biit.cs.ut.ee/gprofiler/gost>) (60) for enrichment analysis of genes in  
474 the KEGG (61), REACTOME (62), WikiPathways pathways (63), and the Gene Ontology (GO):  
475 molecular functions (MF), cellular components (CC) and biological processes (BP) gene sets  
476 (64). A hypergeometric test was performed to estimate statistical significance, and all P values  
477 were adjusted for multiple testing using g:SCS (Set Counts and Sizes) correction (65). The genes  
478 from the bulk RNA-seq data (ImmPort Accession #1299) (9) were used to custom the statistical  
479 domain scope (i.e., background gene list), the size of which describes the total number of genes  
480 used for random selection and is one of the four parameters for the hypergeometric probability  
481 function for computing statistical significance used in g:GOSt (60).

## 482 **Ligand-receptor Interaction Analysis**

483 For predicting potential ligand-receptor interactions between RA synovium and DRG, we used  
484 the normalized counts per gene as transcripts per million (TPMs) reported in a prior study where  
485 human DRG tissue samples were sequenced using bulk RNA-seq and analyzed (20). We used  
486 the scRNA-seq data from a mouse DRG dataset (21) to generate the transcriptome profiles of  
487 individual cell-types within DRG. Our analysis used the expression values and metadata for each  
488 subpopulation of component cells provided in the National Center for Biotechnology  
489 Information (NCBI) Gene Expression Omnibus (GEO) databases (#GSE139088) generated by

490 the original publication. The cell subpopulations in this mDRG scRNA-seq dataset are  
491 specifically 15 somatosensory neuron subtypes (A $\beta$  field/SA1, A $\beta$  RA-LTMR, A $\delta$ -LTMR, C-  
492 LTMR, CGRP- $\alpha$ , CGRP- $\varepsilon$ , CGRP- $\eta$ , CGRP- $\gamma$ , CGRP- $\theta$ , CGRP- $\zeta$ , Nonpeptidergic nociceptors,  
493 TrpM8, Proprioceptors, SST, Cold thermoceptors) and a cluster of unassigned/non-neuronal cells  
494 (21).

495  
496 For ligand-receptor analysis, we used the ligand-receptor pair interactome containing more than  
497 3,000 interactions (denoted  $I^o$ ) created by a previous publication (19). This prior model mapped  
498 the potential ligand-receptor interactions between DRG neurons and distinct cell types within  
499 tissues throughout the human body by curating a database of ligand and receptor pairs across the  
500 genome, based on the literature and curated bioinformatics databases (66–71).

501  
502 To identify the interactome for a specific ordered pair of tissue or cell types, the ligand-encoding  
503 genes from  $I^o$  were intersected with the genes that satisfy the ligand-side inclusion criteria in the  
504 tissue or cell type wherein we investigate the upstream component of the signaling. Similarly the  
505 receptor-encoding genes of  $I^o$  were intersected with the genes satisfying the receptor-side  
506 inclusion criteria in the tissue or cell type wherein we investigate the downstream component of  
507 the signaling. We generated the interactomes in two different contexts: (i) between each of the 4  
508 fibroblast subtypes in human RA synovial tissue and the human DRG (hDRG) (20) and (ii)  
509 between each of the 4 synovial fibroblast subtypes and each of the 14 neuronal cell types of  
510 mouse DRG (mDRG) (21, 41) (GEO GSE139088). We set the filtering criteria to consider a  
511 confined subset of genes from the bulk or single-cell RNA-seq data in a specific tissue or cell  
512 type depending on the data available and the question being asked in each context. In particular:

513 For each fibroblast subtype in human RA synovial tissue, we included its top 200 marker genes  
514 (18) intersected with the GbGMI-identified 815 pain-associated genes. From the hDRG bulk  
515 RNA-seq data, we included the genes consistently expressed ( $> 0.1$  TPM) in the 16 human DRG  
516 samples with “yes” for their associated pain status (20). On the mDRG scRNA-seq data, we  
517 included the differentially expressed genes (adjusted p-value  $< 0.05$ ) identified by the  
518 FindMarkers function from the R package Seurat (72) for each of the 15 neuronal cell  
519 subpopulations compared to the rest. Lastly, the ligand(/receptor)-coding genes with 0  
520 corresponding receptor(/ligand)-coding genes were excluded from the built interactome.

521  
522 We also performed ligand-receptor interaction analysis between the pain-associated genes  
523 expressed by the four synovial fibroblast subtypes and a scRNA-seq dataset of adolescent mouse  
524 nervous system (MNS) (73). We predicted considerable connections between lining fibroblasts  
525 (SC-F4) and peripheral sensory neurofilament, peptidergic and non-peptidergic neurons, as well  
526 as sympathetic cholinergic and noradrenergic neurons (Fig. S6). These analyses are detailed in  
527 Supplementary Materials.

### 528 **DRG Dissection and Digestion**

529 Prior to extraction of the DRG neurons, chambered coverslips (ibidi 80286) were coated  
530 overnight at 37°C with poly-l-lysine (Sigma-Aldrich P4832) and then for two hours at 37°C with  
531 mouse sarcoma basement membrane laminin (Sigma-Aldrich L2020) diluted 1:50 with 1XPBS  
532 and, with one also coated with 0.2µg/mL hNet4 (R&D Systems 1254-N4).

533  
534 For each assay, sensory DRG neurons were harvested from two female 6-8 week old C57BL/6  
535 mice (Jackson Laboratories), under a dissection microscope using forceps and placed into a



536 waiting 15mL conical tube on ice containing 1X L-15 medium (ThermoFisher 21083027). DRGs  
537 were spun down at 950 rpm for two minutes. Media was aspirated and replaced with 1mL L-15  
538 containing 10mg/mL Dispase II (Sigma-Aldrich 04942078001) and 10mg/mL Collagenase IV  
539 (ThermoFisher 17104019). DRGs were then placed at 37°C for 20 minutes. Enzyme solution was  
540 then carefully aspirated and replaced with 2mL L-15. Pellet was resuspended thoroughly with a  
541 1000ul pipette. 25ul 10mg/mL DNase I was then added and once again the cells were placed at  
542 37°C for 20 minutes. The cells were then spun down for 5 minutes at 950 rpm and resuspended  
543 in 5mL L-15. After another 5 minute centrifugation, the cells were resuspended in 1mL L-15 and  
544 layered on top of 15% ice-cold BSA (Sigma-Aldrich A7906) and spun down at room  
545 temperature for 8 minutes at 1179 rpm to remove myelin. The cell pellet was resuspended in 1X  
546 Neurobasal Plus media (ThermoFisher A3582901) containing B27 (ThermoFisher 17504001)  
547 diluted 1:50, glutaMAX (ThermoFisher 35050061) diluted 1:100, and gentamicin sulfate (Abbott  
548 Laboratories), and then plated onto the pre-coated slides. 0.1ug/mL human beta-NGF (R&D  
549 Systems 256-GF) was added to the media of the positive control slide chamber.

### 550 **Immunofluorescence Staining**

551 After 24 hours, cells were fixed with 4% PFA (Electron Microscopy Sciences 15714-S) for 10  
552 minutes at room temperature and then permeabilized with 0.2% Triton on ice. They were then  
553 blocked with 3% BSA for 1 hour at RT, then incubated at 4°C overnight with primary antibodies  
554 rabbit anti-CGRP (Immunostar 24112) diluted 1:20,000 and mouse anti-beta III tubulin (abcam  
555 ab78078) diluted 1:1000 in 3% BSA. The next day, cells were incubated with secondary  
556 antibodies goat anti-Mouse Alexa Fluor 555 (ThermoFisher A21422) and goat anti-Rabbit Alexa  
557 Fluor 488 (ThermoFisher A11008), both diluted 1:1000, for two hours at room temperature.

558 Following the second incubation, plates were washed three times in 1XPBS, with the second  
559 wash containing DAPI (ThermoFisher D1306) diluted 1:1000.

### 560 **Neurite Imaging, Quantification, and Comparison**

561 Each chambered slide was examined under a Keyence fluorescence microscope and the  
562 accompanying software was used to capture a stitched image of a large 5x5 area randomly  
563 selected on the plate at 10X magnification. Five of these images were captured per plate. To  
564 quantify sprouting versus non-sprouting DRG neurons, each image was examined in ImageJ and  
565 used the Cell Counter plugin to keep track of the total number of sprouting neurons, identified as  
566 having at least three neurites extended from the cell body where the extensions were more than  
567 twice the diameter of the cell body and exhibited some degree of branching. From across these  
568 images, n=10 neurons that exhibited branching were selected and their branching was quantified  
569 using the Sholl Analysis plugin. Each analysis used a start radius of 30 pixels, an end radius of  
570 225 pixels, and a step size of 7. Mixed model repeated measures analysis was used to analyze  
571 Sholl data. The model included group, radius (categorical), and group\*radius interaction as fixed  
572 effects. A significant group\*radius interaction indicated group differences and branching.

### 573 **List of Supplementary Materials**

#### 574 **Materials and Methods**

575 Identify differentially expressed genes via ANOVA test on pain-level-based groupings

576 Ablation study of GbGMI using alternative approaches for gene prioritization

577 Sensitivity analysis of GbGMI on the HSS low-inflammatory patients

578 Methodological Validation of GbGMI on the early RA dataset

579 Ligand-receptor analysis using mouse nervous system scRNA-seq

580 **Fig S1** Overview of Study.

581 **Fig S2** A diagram illustrating the framework of GbGMI for identifying a synovial gene  
582 expression signature that associates with pain.

583 **Fig S3** GbGMI-identified pain-associated synovial gene expression compared against VAS pain  
584 scores in patients with established RA at different levels of synovial inflammation.

585 **Fig S4** GbGMI-identified pain-associated gene expression increases with increasing pain  
586 severity.

587 **Fig S5** Representative staining of CGRP+ DRG neuron *in vitro*.

588 **Fig S6** Sensitivity analysis of GbGMI on the HSS low-inflammatory patients.

589 **Fig S7** Potential ligand-receptor interactions between synovial fibroblasts and neurons in the  
590 mouse nervous system.

591 **Tables S1** Pathway Analysis

592 **Tables S2** Fibroblast–DRG receptor ligand interaction analysis

593 **Tables S3** Fibroblast-Sensory nerve subset receptor ligand interaction analysis

594 **Data file S1** Data file S1 Pathway Analysis.xlsx

595 **Data file S2** Data file S2 Fibroblast - DRG receptor ligand interaction analysis.xlsx

596 **Data file S3** Data file S3 Fibroblast-Sensory nerve subset receptor ligand interaction  
597 analysis.xlsx

598 **References and Notes**

599 1. Marchand F, Perretti M, McMahon SB. Role of the immune system in chronic pain. Nat Rev

- 600        Neurosci. 2005 Jul;6(7):521–32.
- 601    2.    Alivernini S, Firestein GS, McInnes IB. The pathogenesis of rheumatoid arthritis. *Immunity*.  
602        2022 Dec 13;55(12):2255–70.
- 603    3.    Nagy G, Roodenrijs NM, Welsing PM, Kedves M, Hamar A, van der Goes MC, et al.  
604        EULAR definition of difficult-to-treat rheumatoid arthritis. *Ann Rheum Dis*. 2021  
605        Jan;80(1):31–5.
- 606    4.    Lee YC, Frits ML, Iannaccone CK, Weinblatt ME, Shadick NA, Williams DA, et al.  
607        Subgrouping of patients with rheumatoid arthritis based on pain, fatigue, inflammation, and  
608        psychosocial factors. *Arthritis Rheumatol*. 2014 Aug;66(8):2006–14.
- 609    5.    McWilliams DF, Rahman S, James RJE, Ferguson E, Kiely PDW, Young A, et al. Disease  
610        activity flares and pain flares in an early rheumatoid arthritis inception cohort;  
611        characteristics, antecedents and sequelae. *BMC Rheumatol*. 2019 Nov 18;3:49.
- 612    6.    Pollard LC, Choy EH, Gonzalez J, Khoshaba B, Scott DL. Fatigue in rheumatoid arthritis  
613        reflects pain, not disease activity. *Rheumatology* . 2006 Jul;45(7):885–9.
- 614    7.    Stebbings S, Herbison P, Doyle TCH, Treharne GJ, Highton J. A comparison of fatigue  
615        correlates in rheumatoid arthritis and osteoarthritis: disparity in associations with disability,  
616        anxiety and sleep disturbance. *Rheumatology* . 2010 Feb;49(2):361–7.
- 617    8.    Buch MH, Eyre S, McGonagle D. Persistent inflammatory and non-inflammatory  
618        mechanisms in refractory rheumatoid arthritis. *Nat Rev Rheumatol*. 2021 Jan;17(1):17–33.
- 619    9.    Orange DE, Agius P, DiCarlo EF, Robine N, Geiger H, Szymonifka J, et al. Identification of

- 620 Three Rheumatoid Arthritis Disease Subtypes by Machine Learning Integration of Synovial  
621 Histologic Features and RNA Sequencing Data. *Arthritis Rheumatol.* 2018 May;70(5):690–  
622 701.
- 623 10. Lewis MJ, Barnes MR, Blighe K, Goldmann K, Rana S, Hackney JA, et al. Molecular  
624 Portraits of Early Rheumatoid Arthritis Identify Clinical and Treatment Response  
625 Phenotypes. *Cell Rep.* 2019 Aug 27;28(9):2455–70.e5.
- 626 11. Dennis G Jr, Holweg CTJ, Kummerfeld SK, Choy DF, Setiadi AF, Hackney JA, et al.  
627 Synovial phenotypes in rheumatoid arthritis correlate with response to biologic therapeutics.  
628 *Arthritis Res Ther.* 2014 Apr 30;16(2):R90.
- 629 12. Humby F, Lewis M, Ramamoorthi N, Hackney JA, Barnes MR, Bombardieri M, et al.  
630 Synovial cellular and molecular signatures stratify clinical response to csDMARD therapy  
631 and predict radiographic progression in early rheumatoid arthritis patients. *Ann Rheum Dis.*  
632 2019 Jun;78(6):761–72.
- 633 13. Nerviani A, Di Cicco M, Mahto A, Lliso-Ribera G, Rivellese F, Thorborn G, et al. A Pauci-  
634 Immune Synovial Pathotype Predicts Inadequate Response to TNF $\alpha$ -Blockade in  
635 Rheumatoid Arthritis Patients. *Front Immunol.* 2020 May 5;11:845.
- 636 14. Ritchie ME, Phipson B, Wu D, Hu Y, Law CW, Shi W, et al. limma powers differential  
637 expression analyses for RNA-sequencing and microarray studies. *Nucleic Acids Res.* 2015  
638 Apr 20;43(7):e47.
- 639 15. Guan S, Mehta B, Slater D, Thompson JR, DiCarlo E, Pannellini T, et al. Rheumatoid  
640 Arthritis Synovial Inflammation Quantification Using Computer Vision. *ACR Open*

- 641 Rheumatol. 2022 Apr;4(4):322–31.
- 642 16. He X, Cai D, Niyogi P. Laplacian Score for Feature Selection. *Adv Neural Inf Process Syst*  
643 [Internet]. 2005 [cited 2023 Jul 6];18. Available from:  
644 [https://proceedings.neurips.cc/paper\\_files/paper/2005/file/b5b03f06271f8917685d14cea7c6](https://proceedings.neurips.cc/paper_files/paper/2005/file/b5b03f06271f8917685d14cea7c6c50a-Paper.pdf)  
645 [c50a-Paper.pdf](https://proceedings.neurips.cc/paper_files/paper/2005/file/b5b03f06271f8917685d14cea7c6c50a-Paper.pdf)
- 646 17. Alivernini S, MacDonald L, Elmesmari A, Finlay S, Tolusso B, Gigante MR, et al. Distinct  
647 synovial tissue macrophage subsets regulate inflammation and remission in rheumatoid  
648 arthritis. *Nat Med*. 2020 Aug;26(8):1295–306.
- 649 18. Zhang F, Wei K, Slowikowski K, Fonseka CY, Rao DA, Kelly S, et al. Defining  
650 inflammatory cell states in rheumatoid arthritis joint synovial tissues by integrating single-  
651 cell transcriptomics and mass cytometry. *Nat Immunol*. 2019 Jul;20(7):928–42.
- 652 19. Wangzhou A, Paige C, Neerukonda SV, Naik DK, Kume M, David ET, et al. A ligand-  
653 receptor interactome platform for discovery of pain mechanisms and therapeutic targets. *Sci*  
654 *Signal* [Internet]. 2021 Mar 16;14(674). Available from:  
655 <http://dx.doi.org/10.1126/scisignal.abe1648>
- 656 20. North RY, Li Y, Ray P, Rhines LD, Tatsui CE, Rao G, et al. Electrophysiological and  
657 transcriptomic correlates of neuropathic pain in human dorsal root ganglion neurons. *Brain*.  
658 2019 May 1;142(5):1215–26.
- 659 21. Sharma N, Flaherty K, Lezgiyeva K, Wagner DE, Klein AM, Ginty DD. The emergence of  
660 transcriptional identity in somatosensory neurons. *Nature*. 2020 Jan;577(7790):392–8.
- 661 22. Mapp PI, Walsh DA, Garrett NE, Kidd BL, Cruwys SC, Polak JM, et al. Effect of three

- 662 animal models of inflammation on nerve fibres in the synovium. *Ann Rheum Dis*. 1994  
663 Apr;53(4):240–6.
- 664 23. Serafini T, Kennedy TE, Galko MJ, Mirzayan C, Jessell TM, Tessier-Lavigne M. The  
665 netrins define a family of axon outgrowth-promoting proteins homologous to *C. elegans*  
666 UNC-6. *Cell*. 1994 Aug 12;78(3):409–24.
- 667 24. Koch M, Murrell JR, Hunter DD, Olson PF, Jin W, Keene DR, et al. A novel member of the  
668 netrin family, beta-netrin, shares homology with the beta chain of laminin: identification,  
669 expression, and functional characterization. *J Cell Biol*. 2000 Oct 16;151(2):221–34.
- 670 25. Reuten R, Patel TR, McDougall M, Rama N, Nikodemus D, Gibert B, et al. Structural  
671 decoding of netrin-4 reveals a regulatory function towards mature basement membranes. *Nat*  
672 *Commun*. 2016 Nov 30;7:13515.
- 673 26. Hayano Y, Sasaki K, Ohmura N, Takemoto M, Maeda Y, Yamashita T, et al. Netrin-4  
674 regulates thalamocortical axon branching in an activity-dependent fashion. *Proc Natl Acad*  
675 *Sci U S A*. 2014 Oct 21;111(42):15226–31.
- 676 27. Lindsay RM. Nerve growth factors (NGF, BDNF) enhance axonal regeneration but are not  
677 required for survival of adult sensory neurons. *J Neurosci*. 1988 Jul;8(7):2394–405.
- 678 28. Denk F, Bennett DL, McMahon SB. Nerve Growth Factor and Pain Mechanisms. *Annu Rev*  
679 *Neurosci*. 2017 Jul 25;40:307–25.
- 680 29. Aalkjær C, Nilsson H, De Mey JGR. Sympathetic and Sensory-Motor Nerves in Peripheral  
681 Small Arteries. *Physiol Rev*. 2021 Apr 1;101(2):495–544.

- 682 30. Gonçalves Dos Santos G, Jimenéz-Andrade JM, Woller SA, Muñoz-Islas E, Ramírez-Rosas  
683 MB, Ohashi N, et al. The neuropathic phenotype of the K/BxN transgenic mouse with  
684 spontaneous arthritis: pain, nerve sprouting and joint remodeling. *Sci Rep*. 2020 Sep  
685 24;10(1):15596.
- 686 31. Obeidat AM, Miller RE, Miller RJ, Malfait AM. The nociceptive innervation of the normal  
687 and osteoarthritic mouse knee. *Osteoarthritis Cartilage*. 2019 Nov;27(11):1669–79.
- 688 32. Aso K, Shahtaheri SM, Hill R, Wilson D, McWilliams DF, Nwosu LN, et al. Contribution  
689 of nerves within osteochondral channels to osteoarthritis knee pain in humans and rats.  
690 *Osteoarthritis Cartilage*. 2020 Sep;28(9):1245–54.
- 691 33. Zhu S, Zhu J, Zhen G, Hu Y, An S, Li Y, et al. Subchondral bone osteoclasts induce sensory  
692 innervation and osteoarthritis pain. *J Clin Invest*. 2019 Mar 1;129(3):1076–93.
- 693 34. Nanus DE, Badoume A, Wijesinghe SN, Halsey AM, Hurley P, Ahmed Z, et al. Synovial  
694 tissue from sites of joint pain in knee osteoarthritis patients exhibits a differential phenotype  
695 with distinct fibroblast subsets. *EBioMedicine*. 2021 Oct;72:103618.
- 696 35. Borges JP, Mekhail K, Fairn GD, Antonescu CN, Steinberg BE. Modulation of Pathological  
697 Pain by Epidermal Growth Factor Receptor. *Front Pharmacol*. 2021 May 12;12:642820.
- 698 36. Wang Y, Zhang F, Zhang Y, Shan Q, Liu W, Zhang F, et al. Betacellulin regulates  
699 peripheral nerve regeneration by affecting Schwann cell migration and axon elongation. *Mol*  
700 *Med*. 2021 Mar 25;27(1):27.
- 701 37. Aletaha D, Neogi T, Silman AJ, Funovits J, Felson DT, Bingham CO 3rd, et al. 2010  
702 Rheumatoid arthritis classification criteria: an American College of



- 703 Rheumatology/European League Against Rheumatism collaborative initiative. *Arthritis*  
704 *Rheum.* 2010 Sep;62(9):2569–81.
- 705 38. Roos EM, Roos HP, Lohmander LS, Ekdahl C, Beynnon BD. Knee Injury and Osteoarthritis  
706 Outcome Score (KOOS)--development of a self-administered outcome measure. *J Orthop*  
707 *Sports Phys Ther.* 1998 Aug;28(2):88–96.
- 708 39. Nilsson AK, Lohmander LS, Klässbo M, Roos EM. Hip disability and osteoarthritis  
709 outcome score (HOOS)--validity and responsiveness in total hip replacement. *BMC*  
710 *Musculoskelet Disord.* 2003 May 30;4:10.
- 711 40. Orange DE, Agius P, DiCarlo EF, Mirza SZ, Pannellini T, Szymonifka J, et al. Histologic  
712 and Transcriptional Evidence of Subclinical Synovial Inflammation in Patients With  
713 Rheumatoid Arthritis in Clinical Remission. *Arthritis Rheumatol.* 2019 Jul;71(7):1034–41.
- 714 41. Fraenkel L, Bathon JM, England BR, St Clair EW, Arayssi T, Carandang K, et al. 2021  
715 American College of Rheumatology Guideline for the Treatment of Rheumatoid Arthritis.  
716 *Arthritis Care Res .* 2021 Jul;73(7):924–39.
- 717 42. Dobin A, Davis CA, Schlesinger F, Drenkow J, Zaleski C, Jha S, et al. STAR: ultrafast  
718 universal RNA-seq aligner. *Bioinformatics.* 2013 Jan 1;29(1):15–21.
- 719 43. Leek JT, Storey JD. Capturing heterogeneity in gene expression studies by surrogate  
720 variable analysis. *PLoS Genet.* 2007 Sep;3(9):1724–35.
- 721 44. Love MI, Huber W, Anders S. Moderated estimation of fold change and dispersion for  
722 RNA-seq data with DESeq2. *Genome Biol.* 2014;15(12):550.

- 723 45. Korotkevich G, Sukhov V, Budin N, Shpak B, Artyomov MN, Sergushichev A. Fast gene  
724 set enrichment analysis [Internet]. bioRxiv. bioRxiv; 2016. Available from:  
725 <http://biorxiv.org/lookup/doi/10.1101/060012>
- 726 46. Lyman S, Lee YY, McLawhorn AS, Islam W, MacLean CH. What Are the Minimal and  
727 Substantial Improvements in the HOOS and KOOS and JR Versions After Total Joint  
728 Replacement? Clin Orthop Relat Res. 2018 Dec;476(12):2432–41.
- 729 47. Saeys Y, Inza I, Larrañaga P. A review of feature selection techniques in bioinformatics.  
730 Bioinformatics. 2007 Oct 1;23(19):2507–17.
- 731 48. Liu S, Xu C, Zhang Y, Liu J, Yu B, Liu X, et al. Feature selection of gene expression data  
732 for Cancer classification using double RBF-kernels. BMC Bioinformatics. 2018 Oct  
733 29;19(1):396.
- 734 49. Uzma, Al-Obeidat F, Tubaishat A, Shah B, Halim Z. Gene encoder: a feature selection  
735 technique through unsupervised deep learning-based clustering for large gene expression  
736 data. Neural Comput Appl. 2022 Jun;34(11):8309–31.
- 737 50. Dhal P, Azad C. A comprehensive survey on feature selection in the various fields of  
738 machine learning. Appl Intell. 2022 Mar;52(4):4543–81.
- 739 51. Daphne Koller MS. Toward Optimal Feature Selection. In: Saitta L, editor. ICML'96:  
740 Proceedings of the Thirteenth International Conference on International Conference on  
741 Machine Learning. 340 Pine Street, Sixth Floor San Francisco CA United States: Morgan  
742 Kaufmann Publishers Inc.; 1996. p. 284–92.
- 743 52. Wang H, Khoshgoftaar TM, Gao K. A comparative study of filter-based feature ranking

- 744 techniques [Internet]. [cited 2023 Jul 6]. Available from:  
745 <https://ieeexplore.ieee.org/abstract/document/5558966>
- 746 53. Solorio-Fernández S, Carrasco-Ochoa JA, Martínez-Trinidad JF. A review of unsupervised  
747 feature selection methods. *Artif Intell Rev.* 2020 Feb;53(2):907–48.
- 748 54. Ang JC, Mirzal A, Haron H, Hamed HNA. Supervised, Unsupervised, and Semi-Supervised  
749 Feature Selection: A Review on Gene Selection. *IEEE/ACM Trans Comput Biol Bioinform.*  
750 2016 Sep-Oct;13(5):971–89.
- 751 55. El Aboudi N, Benhlima L. Review on wrapper feature selection approaches. In: 2016  
752 International Conference on Engineering & MIS (ICEMIS) [Internet]. IEEE; 2016.  
753 Available from: <http://ieeexplore.ieee.org/document/7745366/>
- 754 56. Gönen M AE. Multiple Kernel Learning Algorithms. *J Mach Learn Res.*  
755 2011;12(64):2211–2268.
- 756 57. van der Maaten L, Hinton G. Visualizing Data using t-SNE. *J Mach Learn Res.*  
757 2008;9(86):2579–605.
- 758 58. Wang B, Zhu J, Pierson E, Ramazzotti D, Batzoglou S. Visualization and analysis of single-  
759 cell RNA-seq data by kernel-based similarity learning. *Nat Methods.* 2017 Apr;14(4):414–6.
- 760 59. Hinton GE, Roweis S. Stochastic Neighbor Embedding. *Adv Neural Inf Process Syst*  
761 [Internet]. 2002 [cited 2023 Jul 6];15. Available from:  
762 [https://proceedings.neurips.cc/paper\\_files/paper/2002/file/6150ccc6069bea6b5716254057a1](https://proceedings.neurips.cc/paper_files/paper/2002/file/6150ccc6069bea6b5716254057a194ef-Paper.pdf)  
763 [94ef-Paper.pdf](https://proceedings.neurips.cc/paper_files/paper/2002/file/6150ccc6069bea6b5716254057a194ef-Paper.pdf)

- 764 60. Raudvere U, Kolberg L, Kuzmin I, Arak T, Adler P, Peterson H, et al. g:Profiler: a web  
765 server for functional enrichment analysis and conversions of gene lists (2019 update).  
766 *Nucleic Acids Res.* 2019 Jul 2;47(W1):W191–8.
- 767 61. Kanehisa M, Goto S, Sato Y, Furumichi M, Tanabe M. KEGG for integration and  
768 interpretation of large-scale molecular data sets. *Nucleic Acids Res.* 2012 Jan;40(Database  
769 issue):D109–14.
- 770 62. Fabregat A, Jupe S, Matthews L, Sidiropoulos K, Gillespie M, Garapati P, et al. The  
771 Reactome Pathway Knowledgebase. *Nucleic Acids Res.* 2018 Jan 4;46(D1):D649–55.
- 772 63. Kelder T, van Iersel MP, Hanspers K, Kutmon M, Conklin BR, Evelo CT, et al.  
773 WikiPathways: building research communities on biological pathways. *Nucleic Acids Res.*  
774 2012 Jan;40(Database issue):D1301–7.
- 775 64. Ashburner M, Ball CA, Blake JA, Botstein D, Butler H, Cherry JM, et al. Gene ontology:  
776 tool for the unification of biology. The Gene Ontology Consortium. *Nat Genet.* 2000  
777 May;25(1):25–9.
- 778 65. Reimand J, Kull M, Peterson H, Hansen J, Vilo J. g:Profiler--a web-based toolset for  
779 functional profiling of gene lists from large-scale experiments. *Nucleic Acids Res.* 2007  
780 Jul;35(Web Server issue):W193–200.
- 781 66. Ramilowski JA, Goldberg T, Harshbarger J, Kloppmann E, Lizio M, Satagopam VP, et al. A  
782 draft network of ligand-receptor-mediated multicellular signalling in human. *Nat Commun.*  
783 2015 Jul 22;6:7866.
- 784 67. Binder JX, Pletscher-Frankild S, Tsafou K, Stolte C, O'Donoghue SI, Schneider R, et al.

- 785 COMPARTMENTS: unification and visualization of protein subcellular localization  
786 evidence. Database . 2014 Feb 25;2014:bau012.
- 787 68. Szklarczyk D, Gable AL, Lyon D, Junge A, Wyder S, Huerta-Cepas J, et al. STRING v11:  
788 protein-protein association networks with increased coverage, supporting functional  
789 discovery in genome-wide experimental datasets. *Nucleic Acids Res.* 2019 Jan  
790 8;47(D1):D607–13.
- 791 69. Yates B, Braschi B, Gray KA, Seal RL, Tweedie S, Bruford EA. Genenames.org: the  
792 HGNC and VGNC resources in 2017. *Nucleic Acids Res.* 2017 Jan 4;45(D1):D619–25.
- 793 70. Braschi B, Denny P, Gray K, Jones T, Seal R, Tweedie S, et al. Genenames.org: the HGNC  
794 and VGNC resources in 2019. *Nucleic Acids Res.* 2019 Jan 8;47(D1):D786–92.
- 795 71. Carbon S, Ireland A, Mungall CJ, Shu S, Marshall B, Lewis S, et al. AmiGO: online access  
796 to ontology and annotation data. *Bioinformatics.* 2009 Jan 15;25(2):288–9.
- 797 72. Hao Y, Hao S, Andersen-Nissen E, Mauck WM 3rd, Zheng S, Butler A, et al. Integrated  
798 analysis of multimodal single-cell data. *Cell.* 2021 Jun 24;184(13):3573–87.e29.
- 799 73. Zeisel A, Hochgerner H, Lönnerberg P, Johnsson A, Memic F, van der Zwan J, et al.  
800 Molecular Architecture of the Mouse Nervous System. *Cell.* 2018 Aug 9;174(4):999–  
801 1014.e22.

802

803 **Acknowledgments:**

804 We thank the participants who provided synovial tissue and blood samples for this study. We  
805 thank **Alison North, Ph.D. and Christina Pyrgaki, Ph.D.** from the Rockefeller University's  
806 Bio-Imaging Resource Center, RRID:SCR\_017791, for help with imaging and image analysis.  
807 This project was funded by the Arthritis Foundation, the Block Family Foundation as well as  
808 NIH R01 AR078268 (DEO), UC2AR081025 (DEO, SG), UL1 TR001866 (DEO),  
809 R01AR077019 (REM), R01AR064251 (AM), R01AR060364 (AM), P30AR079206 (AM) and  
810 the Accelerating Medicines Partnership Program: Rheumatoid Arthritis and Systemic Lupus  
811 Erythematosus (AMP RA/SLE) Network. The AMP Program is a public-private partnership that  
812 includes AbbVie Inc., the Arthritis Foundation, Bristol-Myers Squibb Company, the Foundation  
813 for the National Institutes of Health, GlaxoSmithKline, Janssen Research and Development,  
814 LLC, the Lupus Foundation of America, the Lupus Research Alliance, Merck Sharp & Dohme  
815 Corp., the National Institute of Allergy and Infectious Diseases, the National Institute of Arthritis  
816 and Musculoskeletal and Skin Diseases, Pfizer Inc., the Rheumatology Research Foundation,  
817 Sanofi, and Takeda Pharmaceuticals International, Inc. Funding for AMP RA/SLE work was  
818 provided through grants from the National Institutes of Health (UH2-AR067676, UH2-  
819 AR067677, UH2-AR067679, UH2-AR067681, UH2-AR067685, UH2-AR067688, UH2-  
820 AR067689, UH2-AR067690, UH2-AR067691, UH2-AR067694, and UM2-AR067678). The  
821 work of ZB and FW was supported by NSF 1750326. The PEAC study was supported by  
822 funding from the UK Medical Research Council (MRC) [grant number G0800648] and core  
823 work was supported by grants from Versus Arthritis [Experimental Arthritis Treatment Centre,  
824 grant number 20022].

825 **Funding:**

826 Arthritis Foundation

- 827 Block Family Foundation
- 828 National Institutes of Health grant R01 AR078268 (DEO)
- 829 National Institutes of Health grant UC2AR081025 (DEO, SG)
- 830 National Institutes of Health grant UL1 TR001866 (DEO)
- 831 National Institutes of Health grant R01AR077019 (REM)
- 832 National Institutes of Health grant R01AR064251 (AM)
- 833 National Institutes of Health grant R01AR060364 (AM)
- 834 National Institutes of Health grant P30AR079206 (AM)
- 835 Accelerating Medicines Partnership Program: Rheumatoid Arthritis and Systemic Lupus
- 836 Erythematosus (AMP RA/SLE) Network
- 837 National Institutes of Health grant UH2-AR067676 (AMP RA/SLE work)
- 838 National Institutes of Health grant UH2-AR067677 (AMP RA/SLE work)
- 839 National Institutes of Health grant UH2-AR067679 (AMP RA/SLE work)
- 840 National Institutes of Health grant UH2-AR067681 (AMP RA/SLE work)
- 841 National Institutes of Health grant UH2-AR067685 (AMP RA/SLE work)
- 842 National Institutes of Health grant UH2-AR067688 (AMP RA/SLE work)
- 843 National Institutes of Health grant UH2-AR067689 (AMP RA/SLE work)
- 844 National Institutes of Health grant UH2-AR067690 (AMP RA/SLE work)
- 845 National Institutes of Health grant UH2-AR067691 (AMP RA/SLE work)
- 846 National Institutes of Health grant UH2-AR067694 (AMP RA/SLE work)

847 National Institutes of Health grant UM2-AR067678 (AMP RA/SLE work)

848 National Science Foundation grant 1750326 (ZB, FW)

849 UK Medical Research Council (MRC) grant G0800648 (PEAC study)

850 Versus Arthritis [Experimental Arthritis Treatment Centre, grant 20022] (PEAC study core

851 work)

852 **Accelerating Medicines Partnership Program: Rheumatoid Arthritis and Systemic Lupus**

853 **Erythematosus (AMP RA/SLE) Network includes:**

854 Jennifer Albrecht<sup>8</sup>, Jennifer H. Anolik<sup>8</sup>, William Apruzzese<sup>9</sup>, Brendan F. Boyce<sup>8</sup>, David L.

855 Boyle<sup>10</sup>, Michael B. Brenner<sup>9</sup>, S. Louis Bridges Jr.<sup>3</sup>, Christopher D. Buckley<sup>11</sup>, Jane H.

856 Buckner<sup>12</sup>, Vivian P. Bykerk<sup>1,3</sup>, James Dolan<sup>9</sup>, Laura T. Donlin<sup>1,3</sup>, Thomas M. Eisenhaure<sup>13</sup>,

857 Andrew Filer<sup>11</sup>, Gary S. Firestein<sup>10</sup>, Chamith Y. Fonseka<sup>9,13</sup>, Ellen M. Gravallese<sup>14</sup>, Peter K.

858 Gregersen<sup>15</sup>, Joel M. Guthridge<sup>16</sup>, Maria Gutierrez-Arcelus<sup>9,13</sup>, Nir Hacohen<sup>13</sup>, V. Michael

859 Holers<sup>7</sup>, Laura B. Hughes<sup>17</sup>, Lionel B. Ivashkiv<sup>1,3,18</sup>, Eddie A. James<sup>12</sup>, Judith A. James<sup>16</sup>, A.

860 Helena Jonsson<sup>9</sup>, Stephen Kelly<sup>19</sup>, James A. Lederer<sup>9</sup>, Yvonne C. Lee<sup>20</sup>, David J. Lieb<sup>13</sup>, Arthur

861 M. Mandelin II<sup>20</sup>, Mandy J. McGeachy<sup>21</sup>, Michael A. McNamara<sup>1,3</sup>, Joseph R. Mears<sup>9,13</sup>, Nida

862 Meednu<sup>8</sup>, Larry Moreland<sup>21</sup>, Harris Perlman<sup>20</sup>, Javier Rangel-Moreno<sup>8</sup>, Deepak A. Rao<sup>9</sup>, Soumya

863 Raychaudhuri<sup>9,13,23</sup>, Christopher Ritchlin<sup>8</sup>, William H. Robinson<sup>24</sup>, Mina Rohani-Pichavant<sup>24</sup>,

864 Karen Salomon-Escoto<sup>14</sup>, Jennifer Seifert<sup>7</sup>, Kamil Slowikowski<sup>9,13</sup>, Darren Tabechian<sup>8</sup>, Jason D.

865 Turner<sup>11</sup>, Paul J. Utz<sup>24</sup>, Gerald F. M. Watts<sup>9</sup>, Kevin Wei<sup>9</sup>

866

867 <sup>8</sup>University of Rochester Medical Center, Rochester, NY, USA. <sup>9</sup>Brigham and Women's

868 Hospital and Harvard Medical School, Boston, MA, USA. <sup>10</sup>University of California, San Diego,



869 La Jolla, CA, USA. <sup>11</sup>University Hospitals Birmingham NHS Foundation Trust and University of  
870 Birmingham, Birmingham, UK. <sup>12</sup>Benaroya Research Institute at Virginia Mason, Seattle, WA,  
871 USA. <sup>13</sup>Broad Institute of MIT and Harvard, Cambridge, MA, USA. <sup>14</sup>University of  
872 Massachusetts Medical School, Worcester, MA, USA. <sup>15</sup>Feinstein Institute for Medical  
873 Research, Northwell Health, Manhasset, New York, NY, USA. <sup>16</sup>Oklahoma Medical Research  
874 Foundation, Oklahoma City, OK, USA. <sup>17</sup>University of Alabama at Birmingham, Birmingham,  
875 AL, USA. <sup>18</sup>Weill Cornell Graduate School of Medical Sciences, New York, NY, USA. <sup>19</sup>Barts  
876 Health NHS Trust, London, UK. <sup>20</sup>Northwestern University Feinberg School of Medicine,  
877 Chicago, IL, USA. <sup>21</sup>University of Pittsburgh School of Medicine, Pittsburgh, PA, USA.  
878 <sup>22</sup>Graduate School of Medical and Dental Sciences, Tokyo Medical and Dental University,  
879 Tokyo, Japan. <sup>23</sup>Arthritis Research UK Centre for Genetics and Genomics, Centre for  
880 Musculoskeletal Research, The University of Manchester, Manchester, UK. <sup>24</sup>Stanford  
881 University School of Medicine, Palo Alto, CA, USA.

882 **Author contributions:**

883 Designing research studies: ZB, NB, MA, AM, REM, SG, FW, DEO

884 Designing and implementing algorithms and frameworks: ZB

885 Acquiring data: MA, CH, EAM, NEB, SP, ES, ED, MHS, MJL, SS, CP, AM, REM, SG, FW,

886 DEO

887 Conducting experiments: ZB, MA, EAM, NEB, SP, AM, REM, FW, DEO

888 Analyzing data: ZB, NB, MA, CH, EAM, NEB, SP, ES, ED, MHS, MOF, CSJ, HZ, MJL, SS,

889 CP, AM, REM, FZ, SG, FW, DEO

890 Writing the manuscript: ZB, NB, MA, CH, EAM, NEB, SP, ES, ED, MHS, MOF, CSJ, HZ, MJL,

891 SS, CP, AM, REM, FZ, SG, FW, DEO

892 **Competing interests:** Authors declare that they have no competing interests.

893 **Data and materials availability:** All data sources are available in the main text or the  
894 supplementary materials. For codes and any questions, please contact Zilong Bai at  
895 [zib4001@med.cornell.edu](mailto:zib4001@med.cornell.edu) .

896 **Figures**

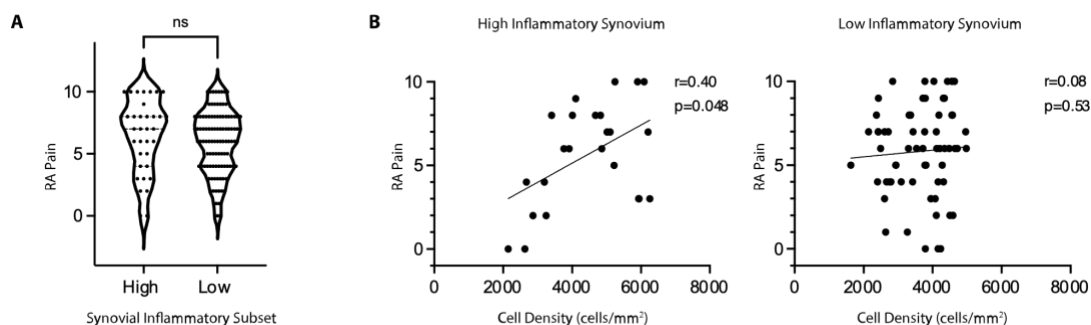

897

898 **Fig. 1. Pain is related to synovial inflammation in RA patients with high, but not low,**

899 **synovial inflammation. (A)** RA pain scores according to synovial tissue inflammatory

900 **classification in n=139 patients. (B)** RA pain scores according to cell density, cells/mm<sup>2</sup>

901 **of H&E (hematoxylin and eosin) stained synovial tissue, in samples classified as high or**

902 **low inflammatory. ns=not significant in Mann Whitney test.  $r$ = Spearman's rank**

903 **correlation coefficient.  $p$ = two tailed  $p$ -value.**

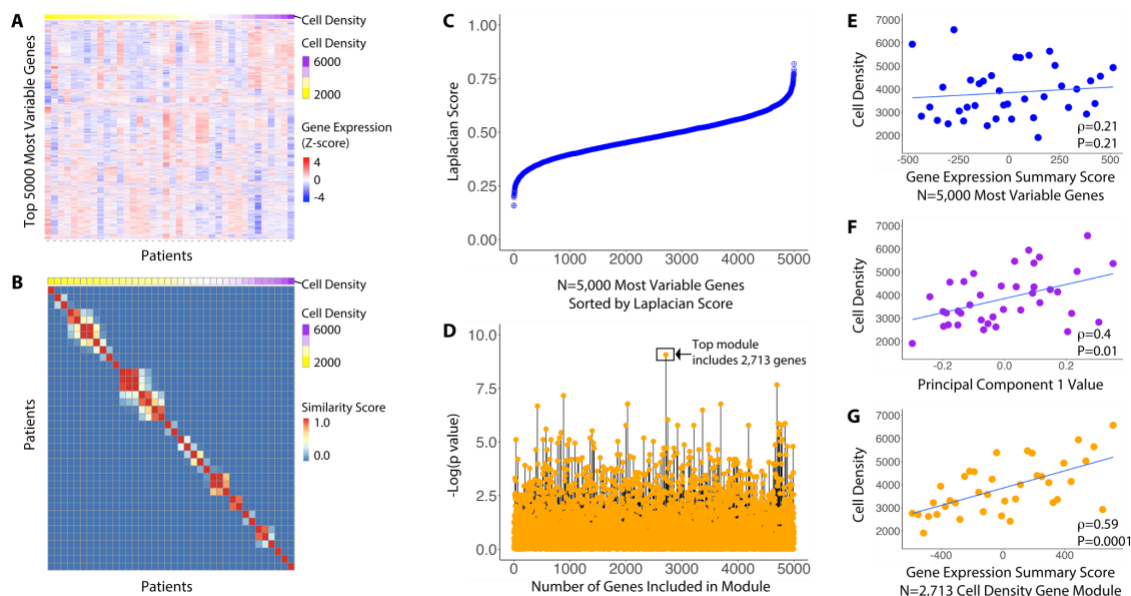

904

905 **Fig. 2. Identification of a synovial gene expression signature that correlates with synovial**

906 **histologic cell density using GbGMI or PCA. (A)** Expression heatmap of the top 5,000

907 most variably expressed genes in 38 patients. Gene expression levels (rows) are

908 represented as z-scores for all patients. Patients (columns) are sorted by their mean nuclei

909 densities. **(B)** Similarity matrix of synovial histologic cell densities. **(C)** Laplacian scores

910 of the top 5,000 most variably expressed genes measuring how their expression levels

911 varied compared to synovial histologic cell density similarity structure, each dot

912 represents a gene, sorted by Laplacian score in ascending order. **(D)**  $-\log(P \text{ value})$  of the

913 correlation of the top-k-ranked groups of genes with nuclei density similarity structure,

914 each dot represents a group of genes. **(E)** Synovial histologic cell density according to

915 PC1 score of the top 5,000 most variably expressed genes in 38 patients. **(F)** Synovial

916 histologic cell density according to the summary score of the 5,000 genes over the 38

917 patients. **(G)** Synovial histologic cell density according to the summary score of the 2,713

918 GbGMI-identified genes over the 38 patients. Statistics presented in **E**, **F**, and **G** indicate  
 919 Spearman correlation coefficient and P- value.

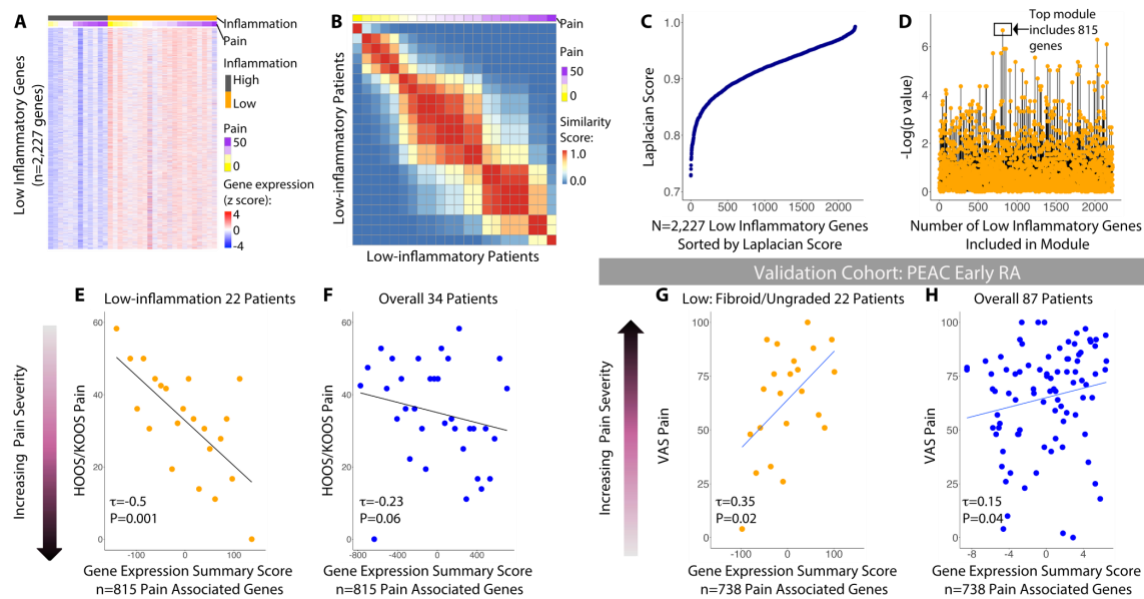

920  
 921 **Fig. 3. GbGMI-identification of pain-associated synovial gene expression in patients with**  
 922 **established and early RA.** (A) Expression heatmap of 2,227 genes with increased  
 923 expression in low inflammatory synovium. Patients (columns) were grouped by  
 924 inflammatory levels: high (n=12) versus low (n=22, low and mixed inflammatory  
 925 subtypes identified by (9)). (B) Similarity structure of HOOS/KOOS pain scores over  
 926 patients. (C) Laplacian scores of the input 2,227 genes measure how their expression  
 927 levels over patients relate to the pain-score-based similarity structure, each dot represents  
 928 a gene, sorted by Laplacian score in ascending order. (D) Significance of the correlation  
 929 between the top k ranked genes and HOOS/KOOS pain scores, each dot represents a  
 930 group of genes. Established RA HOOS/KOOS pain score according to the summary  
 931 score of the 815 GbGMI-identified genes in low inflammatory samples (E) or all  
 932 samples, irrespective of inflammatory status (F). Early RA VAS pain scores, according to

933 gene expression summary score of 738 GbGMI-identified pain-associated genes in  
 934 patients with low inflammatory (fibroid or unassigned) synovial pathotype (**G**) or all  
 935 patients, irrespective of synovial pathotype (**H**). Z-score is calculated from gene  
 936 expression values over patients. Statistics presented in **E**, **F**, **G**, and **H** indicate Kendall  
 937 correlation coefficient and P-value.

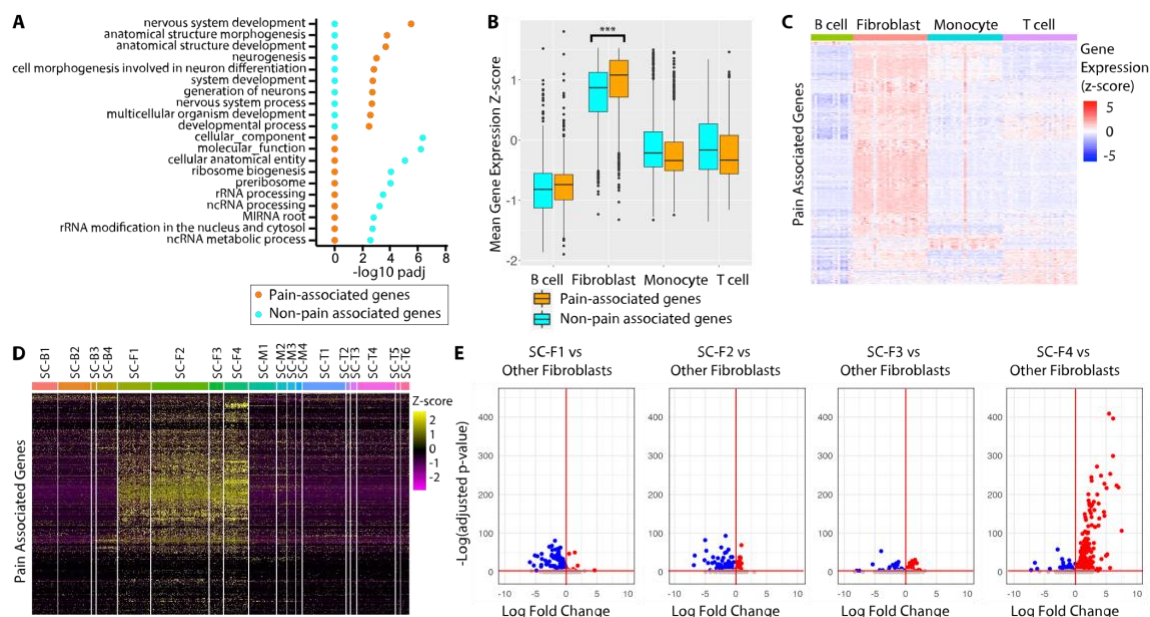

938  
 939 **Fig. 4. GbGMI-identified pain-associated gene signature is expressed by synovial lining**  
 940 **layer fibroblasts. (A)** g:Profiler pathway enrichment analysis of 815 pain associated  
 941 genes and 1,412 non-pain associated low inflammatory genes. **(B)** Mean gene expression  
 942 z score of pain-associated genes and non-pain-associated genes detected in sorted bulk B  
 943 cells (CD45+CD3-CD19+), fibroblasts (CD45-CD31-PDPN+), monocytes  
 944 (CD45+CD14+), and T cells (CD45+CD3+). Z score is calculated on the basis of TPM  
 945 normalized counts. \*\*\* indicates p-value < 0.001. **(C)** Per sample gene expression z  
 946 score of 769 pain-associated genes detected in sorted cell types from **B**. **(D)** Expression  
 947 heatmap of 797 pain genes with non-zero variance in expression values across a subset

948 (n=4,354) of RA synovial cells in 18 unique cell populations (of B cells: SC-B1-4,  
949 Fibroblasts: SC-F1-4, Monocytes: SC-M1-4, T cells: SC-T1-6), which were identified  
950 from the 5,265 scRNA-seq profiles by an integrated analysis based on CCA from the  
951 Accelerating Medicine Partnership (18). Z score is calculated on the basis of  
952  $\log_2(\text{CPM}+1)$  transformed UMIs counts over the RA synovial cells. (E) Volcano plots of  
953 794 pain genes in scRNA-seq profiles (Immport Accession #SDY998) (11) with non-zero  
954 variance in expression values across the subset (n=1,532) of RA synovial fibroblasts in  
955 three sublining subsets, CD34+ (SC-F1), HLA-DRAhi (SC-F2), and DKK3+ (SC-F3)  
956 and one lining subset (SC-F4). Each volcano plot shows the differential expression  
957 analysis (using Seurat function FindMarkers) of the genes in each RA synovial fibroblast  
958 subtype compared to the other three, where x-axis shows  $\log_2(\text{Fold Change})$  and y-axis -  
959  $\log(\text{adjusted p-value})$ . The significantly increased, significantly decreased, and non-  
960 significantly differentially expressed genes are indicated by different colors. The  
961 horizontal and vertical red lines respectively indicate the threshold of significance [-  
962  $\log(\text{adjusted p-value} = 0.05)$ ] and the separation threshold between increased and  
963 decreased gene expression  $\log_2(\text{Fold Change}) = 0$ .

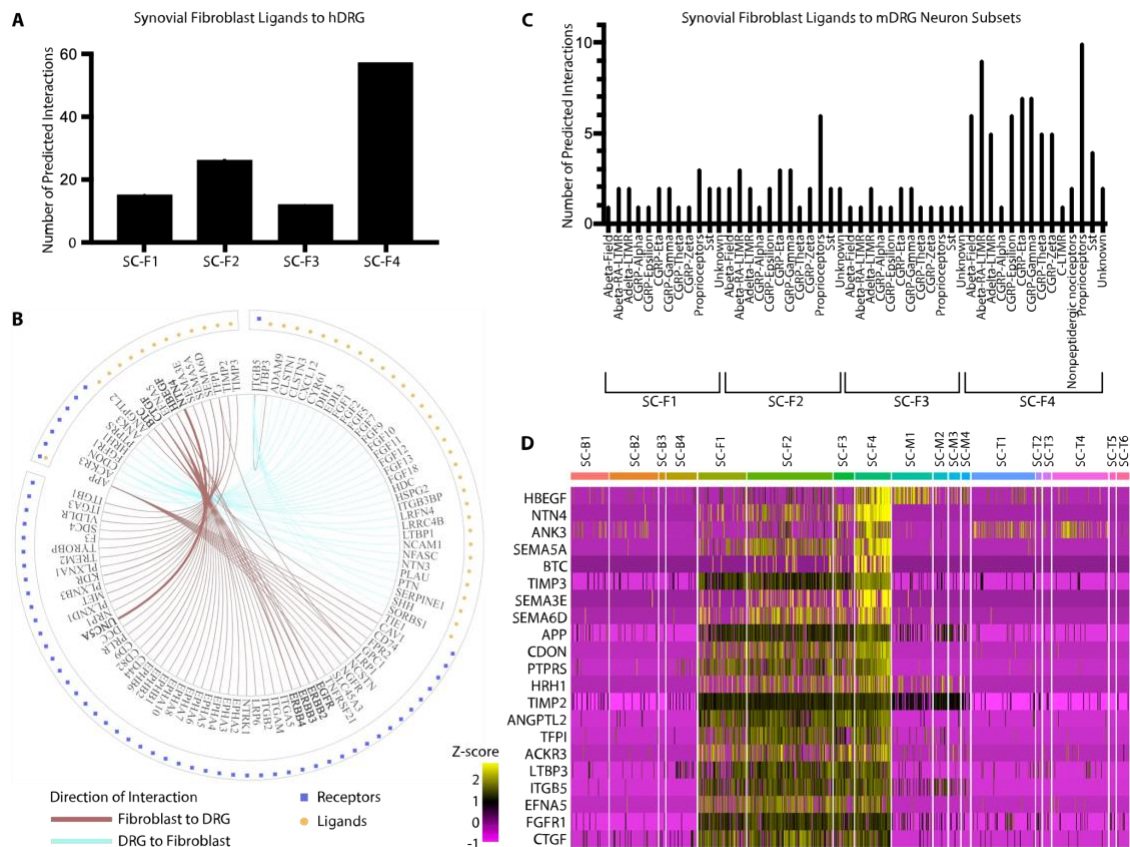

964

965 **Fig. 5. Filtering on synovial fibroblast genes predicted to influence dorsal root ganglion**

966 **sensory nerves. (A)** Number of predicted synovial fibroblast ligands with paired DRG

967 receptors according to fibroblast subset. **(B)** Predicted ligand-receptor pairs between

968 synovial lining fibroblasts (SC-F4) and DRG tissue. The outermost circle indicates the

969 source of expression, synovial lining fibroblast SC-F4 or DRG tissue. The dots represent

970 whether the gene is ligand-coding or receptor-coding. The inner layer contains gene

971 names. The color of the lines connecting the gene names indicate the direction of the

972 interaction. **(C)** Number of predicted interactions between synovial fibroblast subsets and

973 various DRG subsets. **(D)** Expression heatmap of 21 pain-associated ligand/receptor

974 encoding marker genes of synovial lining fibroblast cells with non-zero variance in

975 expression values across a subset (n=4,354) of RA synovial cells in 18 unique cell

976 populations (of B cells: SC-B1-4, Fibroblasts: SC-F1-4, Monocytes: SC-M1-4, T cells:  
977 SC-T1-6), which were identified from the 5,265 scRNA-seq profiles by an integrated  
978 analysis based on CCA from the Accelerating Medicine Partnership (18). Z-score is  
979 calculated on the basis of  $\log_2(\text{CPM}+1)$  transformed UMIs counts over the RA synovial  
980 cells. The genes are ranked top down by their log fold change in DEA of lining fibroblast  
981 vs other fibroblasts.

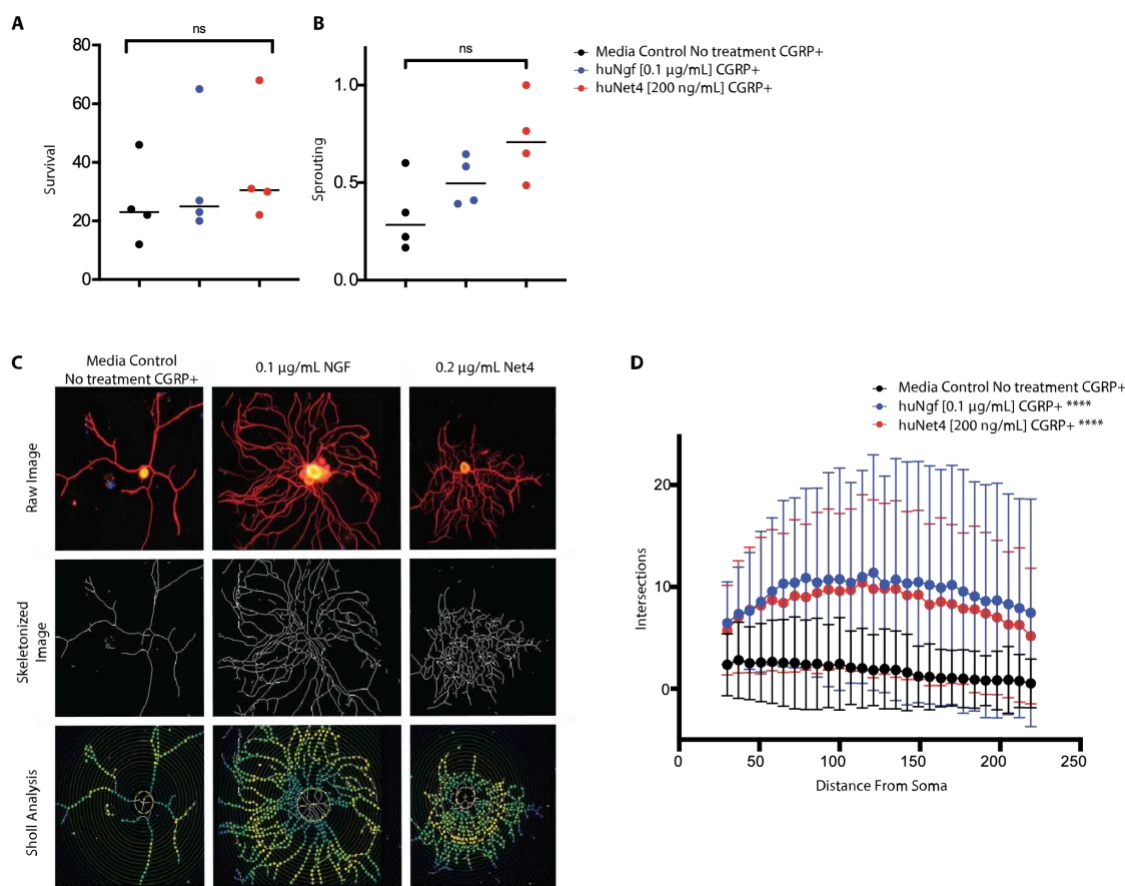

982  
983 **Fig. 6. Effects of synovial fibroblasts products on dorsal root ganglion neurons in vitro. (A)**  
984 Survival of CGRP+ DRG neurons cultured with media alone, Ngf, or Net4. Survival was  
985 measured by the number of Map2b+B3tub+ cells >10µm. Each dot represents the sum of  
986 five 10x magnification views from one experiment. Data from 4 experiments are



987 presented. ns indicates not significant in Kruskal-Wallis test. **(B)** Sum of sprouting  
988 neurons divided by the total number of neurons cultured with media alone, Ngf, or Net4.  
989 Neurons with at least three axon branches greater than two times the size of the soma  
990 were classified as sprouting. Each dot represents the sum of five 10x magnification views  
991 from one experiment. Data from 4 experiments are presented. ns indicates not significant  
992 in Kruskal-Wallis test. **(C)** Representative images of Sholl analysis of branching of DRG  
993 neurons cultured with media alone (no treatment), Ngf, or Net4. **(D)** Branching, as  
994 measured by the number of shell intersections of neurites, in DRG neurons cultured with  
995 media alone (no treatment), Ngf, or Net4. Each dot represents the median with  
996 confidence interval of 40 neurons imaged from four experiments (10 neurons per  
997 experiment). \*\*\*\* indicates  $p < 0.0001$  in two way ANOVA group\*radius interaction with  
998 post-hoc Dunnett's multiple comparisons of each treatment group to the no treatment  
999 group.

1000

1001

## 1002 **Supplementary Materials**

### 1003 **Materials and Methods**

#### 1004 **Identify differentially expressed genes via ANOVA test on pain-level-based groupings**

1005 We investigated the association between gene expression and the grouping structure of patient-  
1006 reported pain in an attempt to identify individual genes that are significantly associated with pain.  
1007 The 22 patients from HSS with relatively low inflammation were binned into low, medium, and  
1008 high pain groups. We conducted the one-way ANOVA test between gene expression and pain-  
1009 level-based groupings of data. To fully utilize the patient-reported pain data, we determine the

1010 thresholds for splitting these 22 patients by different binning strategies applied to the 165 total  
1011 patients from the HSS dataset with HOOS/KOOS pain scores on record. We investigated three  
1012 binning strategies: (i) quartile-based: high pain was associated with pain score below the first  
1013 (lower) quartile, medium pain is defined between the first (lower) and third (upper) quartiles, and  
1014 low pain with the pain score above the third (upper) quartile. This resulted in 6 patients with high  
1015 pain, 15 patients with medium pain, and 1 patient with low pain. (ii) 33-percentile-based: the pain  
1016 scores are grouped into thirds by percentiles, i.e., 0-33, 34-66, 67-100. This resulted in 9 patients  
1017 with high pain, 12 patients with medium pain, and 1 patient with low pain. (iii) mean/stdev-based:  
1018 the binning thresholds of pain scores are defined by the mean and standard deviation computed  
1019 using the pain scores of all 165 patients. Pain scores below the mean - standard deviation  
1020 encompassed patients with high pain, between mean - standard deviation and mean + standard  
1021 deviation are the patients with medium pain, and above the mean + standard deviation are the  
1022 patients with low pain. This resulted in 5 patients with high pain, 17 patients with medium pain,  
1023 and 0 patients with low pain. We performed one-way ANOVA tests using the `aov()` package in the  
1024 R stats library. We applied FDR for multiple testing corrections using the `p.adjust()` function with  
1025 default settings to all tests for each ANOVA. No gene demonstrated statistical significance in any  
1026 of these ANOVA tests after FDR-adjustment (i.e., no gene showed FDR-adjusted p-values  $< 0.05$ ).  
1027 Filtered by raw p-value  $< 0.05$ , we identified one gene (symbol: FAM178B) associated with pain  
1028 in the quartile-based grouping, 11 pain-associated genes using the 33-percentile-based grouping  
1029 (Table S4), and zero pain-associated genes from the mean/stdev-based grouping of patients. We  
1030 performed Pathway Enrichment Analysis on the differentially expressed genes (i.e., FDR-adjusted  
1031 p-value  $< 0.05$ ) using `g:Profiler` (<https://biit.cs.ut.ee/gprofiler/>) with the default background setting  
1032 for all ANOVA results with data sources for gene ontology and biological pathways specified. In

1033 our percentile-based pain bins, we identified 4 significantly enriched (i.e. adjusted p-values  $<0.05$ )  
1034 pathways: methanethiol oxidase activity, ferritin receptor activity, Sulfur metabolism, and TGF-  
1035 beta receptor signaling in skeletal dysplasias. The PEA results for the other ANOVA tests yielded  
1036 no significantly enriched pathways (one differentially expressed gene in quartile-based grouping  
1037 and zero significant genes in mean/stdev-based pain groupings).

### 1038 **Ablation study of GbGMI using alternative approaches for gene prioritization**

1039 To demonstrate the impact of using graph structure over patients for gene prioritization, we  
1040 examined different alternatives to our Laplacian-Score-based approach for gene prioritization in  
1041 our GbGMI framework to identify pain-associated genes. In particular, we sorted the genes based  
1042 on the correlation tests - i.e., Pearsons, Kendall's, and Spearman's, between individual gene's  
1043 expression and pain score, and the one-way ANOVA test between gene expression and the pain-  
1044 level-based groupings of data - i.e., the quartile-based, 33-percentile-based, mean/stdev-based  
1045 patient groupings as described in the previous section. The rows (corresponding with genes) in the  
1046 gene expression matrix are reordered according to one of the alternative gene prioritization  
1047 approaches. For fair comparison with our main results, the top 815 genes in each of these  
1048 alternative gene prioritization lists are selected as the pain-associated gene module. The multi-gene  
1049 expression of each alternative pain-associated gene module is embedded into univariate summary  
1050 scores for the patients via t-SNE as in our GbGMI. We measure the association between the  
1051 different summary scores and the pain score by different correlation tests (Table S5). Note that  
1052 none of these alternative gene prioritization approaches enabled GbGMI to identify statistically  
1053 significant correlation between its top 815 pain-associated gene module summary score and the  
1054 pain score (i.e., their p-values  $\gg 0.05$ ). On the contrary, our GbGMI using Laplacian-Score for

1055 gene prioritization achieved  $P = 0.0013 \ll 0.05$  in Kendall correlation test between its top-815 pain  
1056 associated gene module summary score and the pain score.

### 1057 **Sensitivity analysis of GbGMI on the HSS low-inflammatory patients**

1058 We conducted sensitivity analysis to investigate how the patient composition affects the gene  
1059 prioritization and pain-associated gene subset identification results on the HSS dataset.  
1060 Specifically, we subsampled the  $n=22$  low-inflammatory patients with the leave-one-out strategy,  
1061 resulting in 22 different subsampled datasets. On each subsampled dataset, we applied our GbGMI  
1062 framework to build its pain-score similarity matrix, compute the Laplacian scores for the  $m=2,227$   
1063 low-inflammatory genes for prioritization, and determine the cut-off using t-SNE embeddings and  
1064 correlation test between summary score and pain score to identify the pain-associated gene subset.  
1065 The resultant 23 (22 for subsampled and 1 for overall) pain-associated gene prioritization gene  
1066 lists and pain-associated gene subsets are compared to demonstrate how sensitive our GbGMI is  
1067 with respect to changes in patient set. Each pair of gene prioritization gene lists are compared via  
1068 Spearman's correlation test, with the minimum correlation coefficient  $\rho_{min} = 0.7472$  and all p-  
1069 values  $\ll 0.05$ . (Fig. S6A for pairwise correlation coefficient heatmap.) Each pair of pain-  
1070 associated gene subsets are compared using the Fisher's exact test, with the  $m=2,227$  low-  
1071 inflammatory genes as the background genes. Note that p-value  $\ll 0.05$  between the pain-  
1072 associated gene identification results of each leave-one-out patient subset and the overall relatively  
1073 low-inflammatory patient set. Only 9 pairs of patient subsets with single patient excluded did not  
1074 show significant overlap (p-value  $>0.05$ ), e.g., exclude-RA57.SYN vs exclude-RA147.SYN. (Fig.  
1075 S6B for pairwise Fisher's exact test p-value heatmap.)

1076

### 1077 **Methodological Validation of GbGMI on the early RA dataset.**

1078 In this section, we validate the consistency of low-inflammatory pain-associated genes identified  
1079 across the established RA (i.e., HSS (9) and the early RA datasets (i.e., PEAC (10)). For fair  
1080 comparison, the gene list from RNA-seq on PEAC is intersected with the  $m=2,227$  low-  
1081 inflammatory genes that we identified from the HSS dataset, resulting in a 2,018-gene list for low-  
1082 inflammatory genes on PEAC. Among the 2,018 PEAC low-inflammatory genes, 738 were  
1083 identified to be pain-associated by GbGMI from the HSS dataset. To directly identify pain-  
1084 associated genes with GbGMI from the 2,018 PEAC low-inflammatory genes, we grouped the  
1085 samples labeled as fibroid or ungraded early RA subset and formed a low-inflammatory subset of  
1086  $n=22$  patients. GbGMI was applied to this  $2,018 \times 22$  PEAC low-inflammatory gene expression  
1087 matrix and identified a 658-gene module significantly associated with pain measured by VAS  
1088 score. The 738 HSS and the 658 PEAC pain associated genes demonstrated significant overlap ( $p$ -  
1089 value = 0.0016 and 95% CI [1.1215, 1.6598]) in Fisher's exact test with the 2,018 PEAC low-  
1090 inflammatory genes as background).

### 1091 **Ligand-receptor analysis using mouse nervous system scRNA-seq**

1092 We also performed ligand-receptor interaction analysis between the pain-associated genes  
1093 expressed by the four synovial fibroblast subtypes (CD34+ sublining fibroblasts [SC-F1], HLA-  
1094 DRAhi sublining fibroblasts [SC-F2], DKK3+ sublining fibroblasts [SC-F3], and CD55+ lining  
1095 fibroblasts [SC-F4]) (18) and a mouse nervous system scRNAseq dataset from an adolescent  
1096 mouse nervous system dataset (73). We predicted considerable connections between lining  
1097 fibroblasts (SC-F4) and peripheral sensory neurofilament, peptidergic and non-peptidergic  
1098 neurons, as well as sympathetic cholinergic and noradrenergic neurons (Fig. S7). As we will detail  
1099 in the following, we considered three different scenarios to identify differentially expressed genes  
1100 in a specific neuronal subpopulation from the mouse nervous system scRNA-seq data: each

1101 neuronal cell type vs all the other cell types (including non-neurons), each neuronal cell type vs  
1102 the other neurons, and comparison among three different specific neuron subtypes (i.e., peripheral  
1103 sensory neurofilament neurons, peripheral sensory peptidergic neurons, and peripheral sensory  
1104 non-peptidergic neurons) (Fig. S7).

1105  
1106 **Data:** We used the scRNA-seq data from a mouse nervous system dataset (73) to generate the  
1107 transcriptome profile of individual cell-types in the adolescent mouse nervous system. Our analysis  
1108 used the expression values and metadata for each subpopulation of component cells provided by  
1109 the original publication. The raw sequence data is deposited in the sequence read archive under  
1110 accession SRP135960 in the National Center for Biotechnology Information (NCBI) library. The  
1111 cell subpopulations identified in this mouse nervous system scRNA-seq dataset comprises  
1112 subpopulations of cells (mainly neurons), from both central (CNS) and peripheral nervous systems  
1113 (PNS) (73).

1114  
1115 **Method:** We predicted interactomes for ordered pairs of tissues or cell types that we investigate  
1116 based on the overall interactome containing more than 3,000 interactions (denoted  $I^o$ ) built by  
1117 (19). We identified ligand-to-receptor unidirectional signaling from one tissue or cell type to  
1118 another. To identify the interactome for a specific ordered pair of tissue or cell types, the ligand-  
1119 encoding genes from  $I^o$  were intersected with the genes that satisfy the ligand-side inclusion  
1120 criteria in all samples/cells in a specific tissue or cell type wherein we investigate the upstream  
1121 component of the signaling, and similarly the receptor-encoding genes of  $I^o$  were intersected with  
1122 the genes satisfying receptor-side inclusion criteria in another specific tissue or cell type wherein  
1123 we investigate the downstream component of the signaling.

1124 We generated the interactomes between each of the 4 synovial fibroblast subtypes (18) and each  
1125 selected specific neuronal subpopulation of the mouse nervous system (73). On the mouse nervous  
1126 system scRNA-seq data, we considered three different scenarios to identify differentially  
1127 expressed genes in a specific neuronal subpopulation: (a) each neuronal cell type vs all the other  
1128 cell types (including non-neurons), (b) each neuronal cell type vs the other neurons, and (c)  
1129 comparison among three different specific neuron subtypes (i.e., peripheral sensory neurofilament  
1130 neurons, peripheral sensory peptidergic neurons, and peripheral sensory non-peptidergic neurons).  
1131 In each scenario, the differentially expressed genes (i.e., adjusted p-value <0.05) with higher  
1132 expression values in a specific neuronal cell type are identified by the FindMarkers function from  
1133 the R package Seurat (72) to be the marker genes of a specific neuronal subpopulation. We present  
1134 the two unidirectional interactomes of each scenario in Fig. S7, where we also summarize the  
1135 quantity of ligand-receptor interactions associated with each specific fibroblast or neuronal cell  
1136 type, as well as the total number of interactions, in each tissue-wise direction.

### 1137 **Supplementary Figures**

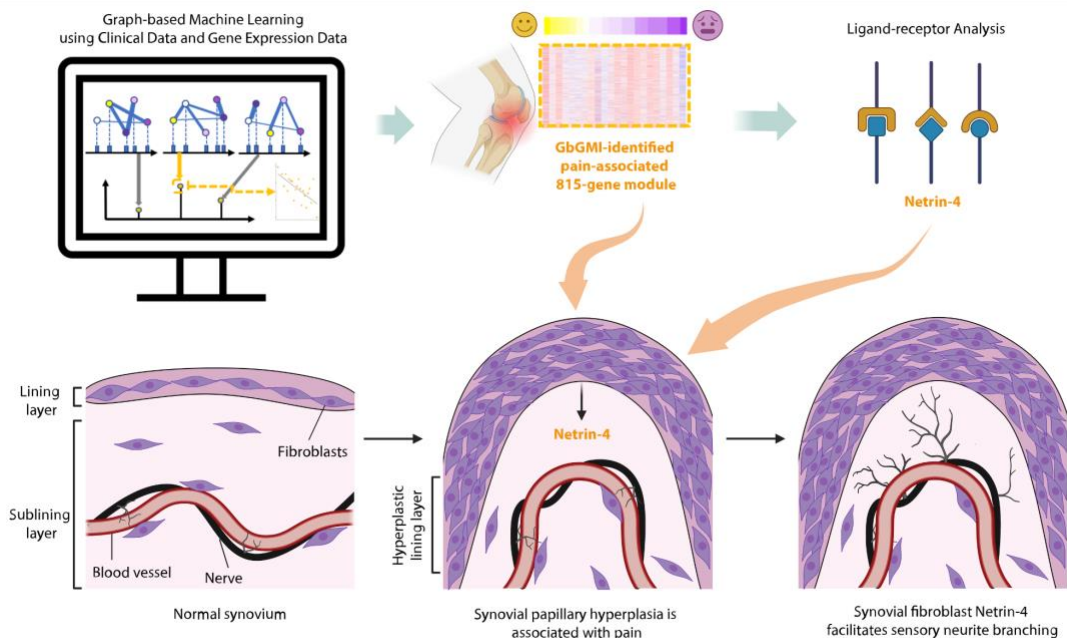

1138

1139 **Fig. S1. Overview of Study.** Graph-based Machine Learning with Clinical Data and Gene  
 1140 Expression Data Identified Synovial Fibroblast Genes Associated with Pain which Affect  
 1141 Sensory Nerve Growth in Rheumatoid Arthritis.

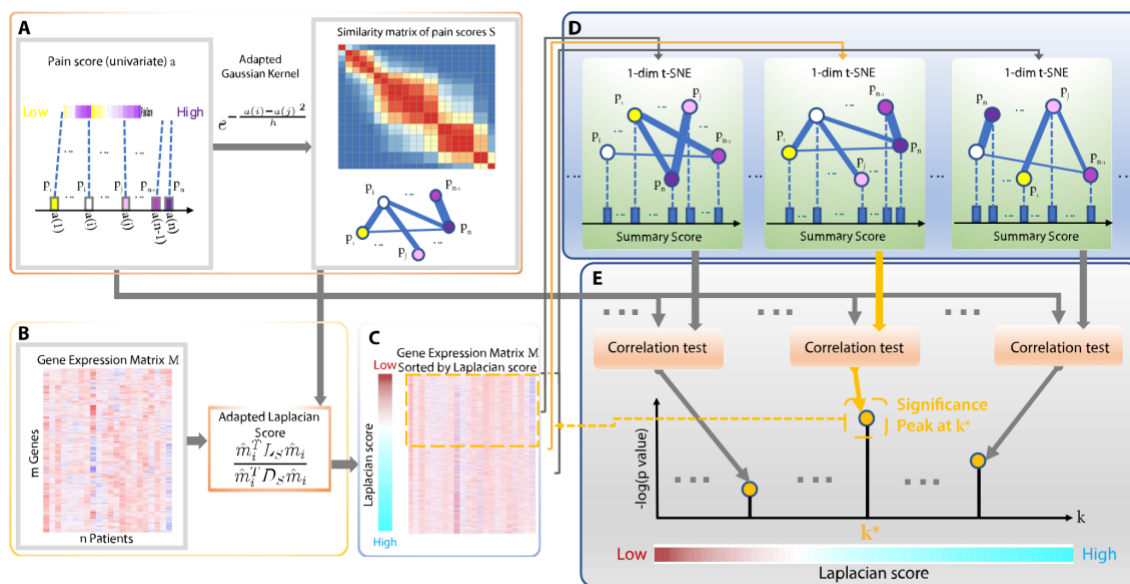

1142



1143 **Fig. S2. A diagram illustrating the framework of GbGMI for identifying a synovial gene**  
1144 **expression signature that associates with pain. (A)** Construction of similarity matrix over  
1145 patients based on a univariate patient-level attribute (e.g., HOOS/KOOS pain score). **(B)**  
1146 Computing Laplacian score for each gene by measuring the concordance between its expression  
1147 values and the similarity matrix  $S$  of pain scores from the same set of patients. **(C)** Synovial gene  
1148 expression matrix with genes sorted by their Laplacian scores in ascending order to form the  
1149 gene prioritization list  $\mathcal{L}_S$ , according to which the rows of the gene expression matrix  $M$  are  
1150 reordered. **(D)** Generating the gene expression summary score vector  $s_k$  for each candidate group  
1151 of top  $k$  genes from  $\mathcal{L}_S$  by performing the 1-dim t-SNE embedding on their  $k \times n$  gene  
1152 expression submatrix  $M_{1:k,*}$ . **(E)** Performing correlation tests between the gene expression  
1153 summary score  $s_k$  and the input univariate pain score  $a$  over the same patients. The  $k^*$  where the  
1154 significance of correlation coefficients peaks is used to select the group of top  $k^*$  genes from the  
1155 prioritization list  $\mathcal{L}_S$  as the synovial gene expression signature that is significantly associated  
1156 with pain.

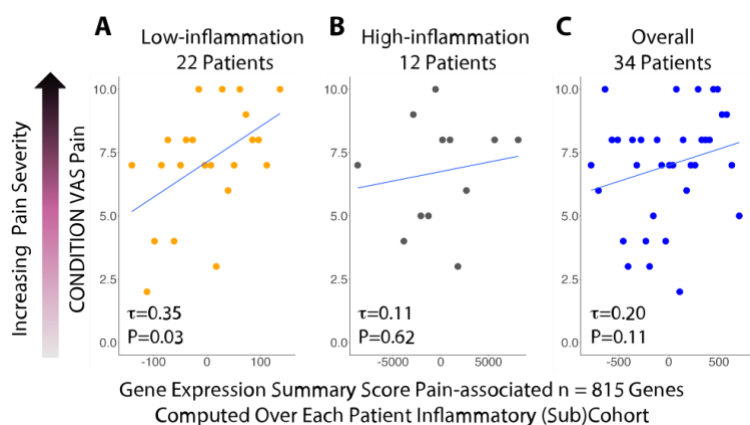

1158 **Fig. S3. GbGMI-identified pain-associated synovial gene expression compared against VAS**  
1159 **pain scores in patients with established RA at different levels of synovial inflammation. (A),**  
1160 **(B), and (C):** Condition-caused VAS pain score according to the summary score of the 815

1161 GbGMI-identified genes in patients with low synovial inflammation (n=22), high synovial  
1162 inflammation (n=12), and overall patients with different levels of synovial inflammation (n=34)  
1163 respectively.

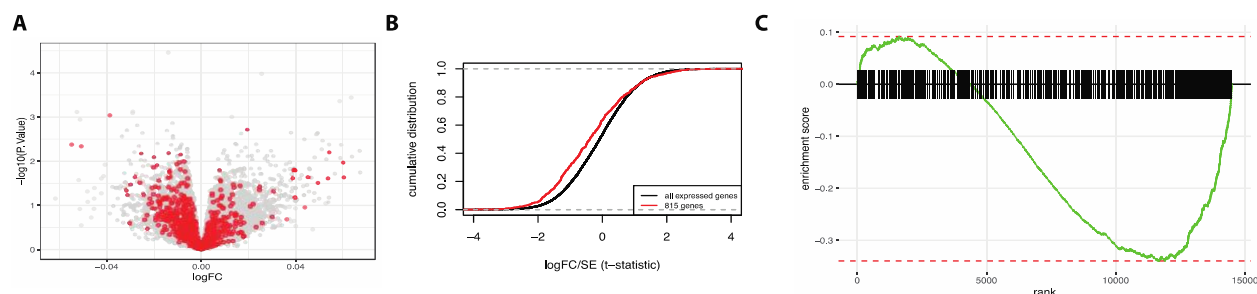

1164

1165 **Fig. S4. GbGMI-identified pain-associated gene expression increases with increasing pain**

1166 **severity.** (A) Volcano plot,  $-\log_{10}(\text{nominal p value})$  and  $\log_{2}(\text{FC})$  (Pain score), of differential

1167 expression analysis with LIMMA (14) for all genes (grey dots) and 815 GbGMI-identified pain-

1168 associated genes (red dots) in the bulk RNA-seq data (9). (B) Cumulative distribution versus t-

1169 statistic comparing the 815-gene set and the set of all genes in synovial tissue gene expression

1170 data (9). (C) GSEA querying the 815 pain-associated genes on the genes from the expression

1171 data sorted by differential expression analysis (see Materials and Methods). Analysis of GbGMI-

1172 identified genes in (A), (B), and (C) consistently indicated that the pain-associated 815 genes as

1173 a group decreased expression as the HOOS/KOOS pain score increases, hence indicating their

1174 positive correlation with pain severity.

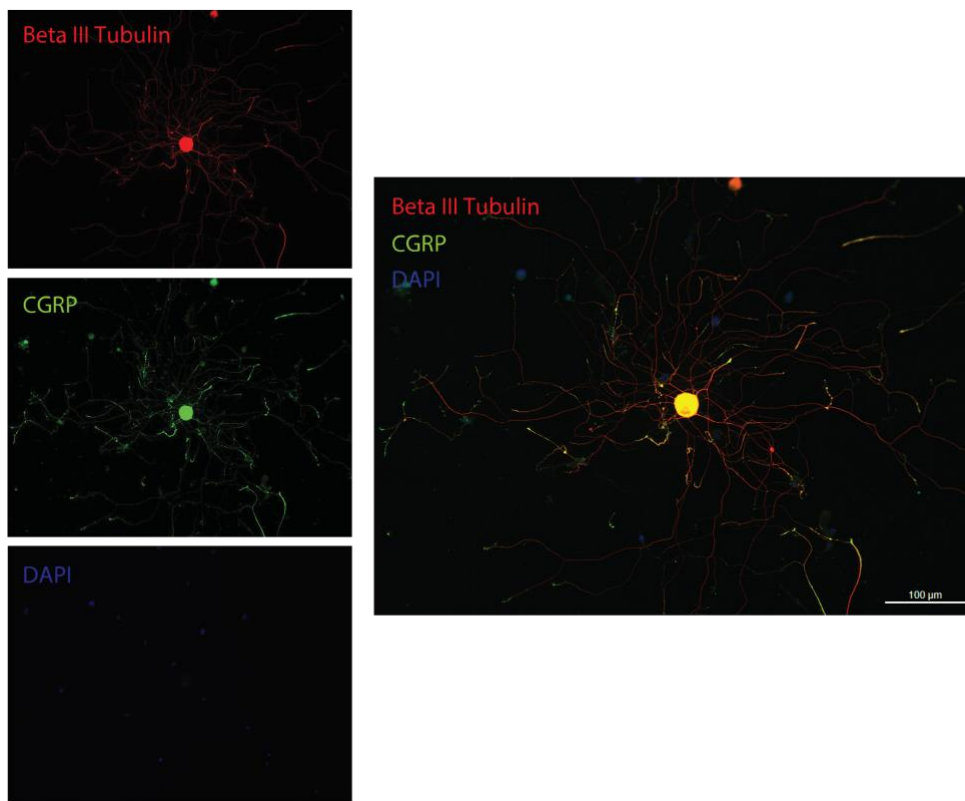

1175

1176 **Fig. S5. Representative staining of CGRP+ DRG neuron *in vitro*.**

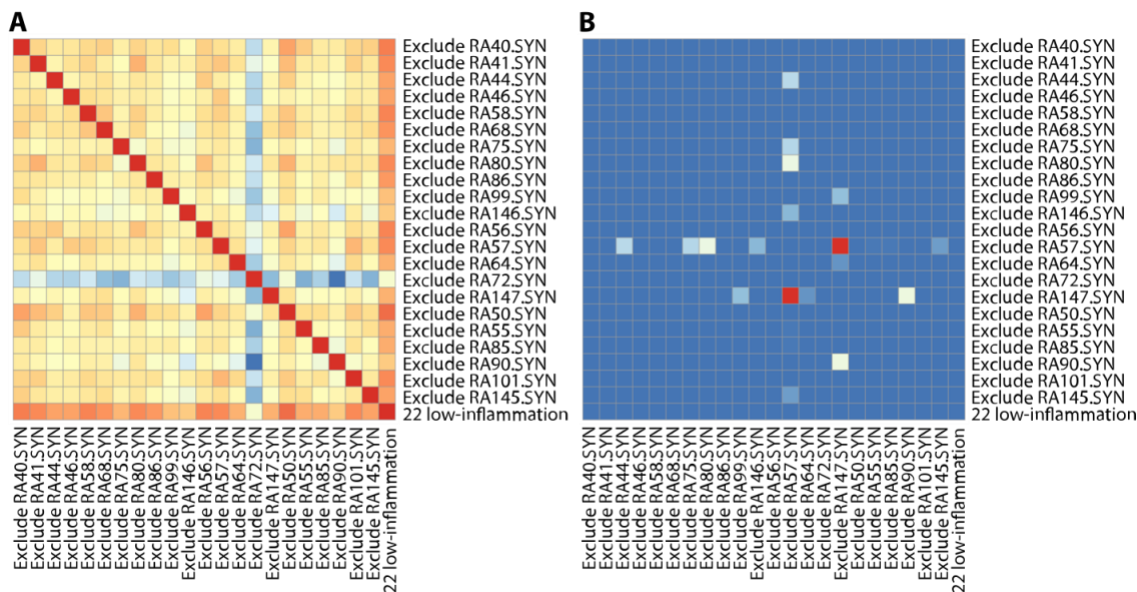

1177

1178 **Fig. S6. Sensitivity analysis of GbGMI on the HSS low-inflammatory patients. (A)** Heatmap  
 1179 of Spearman correlation coefficient between each pair of Laplacian-Score-based gene  
 1180 prioritization lists generated using different patient subsets. **(B)** Heatmap of Fisher's exact test p-  
 1181 values between the pain-associated gene module identification results of different patient subsets.  
 1182 In both **(A)** and **(B)**, the first 22 rows/columns indicate the leave-one-out patient subsets, the last  
 1183 rows/columns indicate all the 22 patients with relatively low inflammation from the HSS cohort.

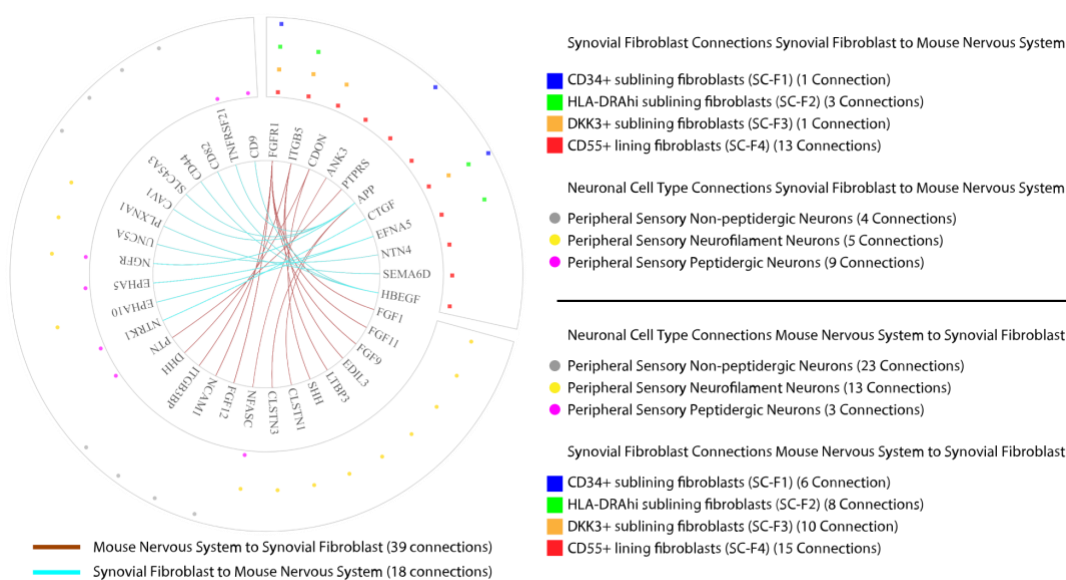

1185 **Fig. S7. Potential ligand-receptor interactions between synovial fibroblasts and neurons in**  
 1186 **the mouse nervous system.** The circos plot shows the two unidirectional interactomes between  
 1187 the four synovial fibroblast subtypes and a subset of neuronal cell subpopulations from the  
 1188 mouse nervous system. The marker genes of its neuron subtypes are identified through  
 1189 comparison among three different specific neuron subtypes (i.e., peripheral sensory  
 1190 neurofilament neurons, peripheral sensory peptidergic neurons, and peripheral sensory non-  
 1191 peptidergic neurons). The outermost circles indicate the RA synovial fibroblast subtype of the  
 1192 cells or mouse nervous system neuronal cell subpopulation expressing corresponding ligand or

1193 receptor genes. The middle layer shows whether a gene is ligand-coding or receptor-coding in its  
1194 associated interactions. The inner layer contains gene names. The two tissue-wise directions are  
1195 distinguished by the colors of connections between gene names. The number of connections  
1196 associated with the ligand/receptor genes in each fibroblast subtype or neuron subtype and in  
1197 each unidirectional tissue-wise relation are summarized in the corresponding legends.

1198

1199 **Table S1: Pathway Analysis (Data file S1)** Pathway enrichment analysis for the GbGMI  
1200 identified 815-gene pain-associated genes. Modified Fisher's exact test based on the  
1201 hypergeometric distribution;  $-\log_{10}$  of P-values after multiple testing correction with g:SCS (65)  
1202 are color-coded for the GO: Biological Processes (BP) terms (adjusted P-value < 0.05)

1203

1204 **Table S2: Fibroblast–DRG receptor ligand interaction analysis (Data file S2)** The ligand-  
1205 receptor pairs identified between the pain-associated genes expressed by four synovial fibroblast  
1206 subtypes in human RA synovial tissue and expressed genes in a human DRG bulk RNA-seq  
1207 dataset (20). Ligand-coding and receptor-coding gene symbols are in the “ligand\_gname” and  
1208 “receptor\_gname” columns respectively. The RA fibroblast subtypes of the ligand-coding genes  
1209 are annotated in the column “ligand\_cell\_type”. The “receptor\_tissue” is human DRG.

1210 **Table S3: Fibroblast-Sensory nerve subset receptor ligand interaction analysis (Data file**  
1211 **S3)** The ligand-receptor pairs identified between the pain-associated genes expressed by the  
1212 synovial fibroblast subsets (18) and a mouse scRNA-seq DRG dataset (21). Ligand-coding and  
1213 receptor-coding gene symbols are in the “ligand\_gname” and “receptor\_gname” columns  
1214 respectively. The receptor coding genes symbols are translated from mouse gene symbols to their  
1215 human gene symbol counterparts. The “receptor\_cell\_type” column denotes the neuronal cell

1216 types from the mDRG dataset of each receptor-coding gene. The column “ligand\_cell\_type”  
1217 denotes the RA fibroblast subtype of each ligand-coding gene.

| <b>Gene</b>  | <b>FDR Adjusted Pval</b> |
|--------------|--------------------------|
| SELENBP1     | 0.024                    |
| FAM178B      | 0.024                    |
| MAP7D2       | 0.048                    |
| SLC22A17     | 0.048                    |
| ZNF423       | 0.048                    |
| PLEKHA4      | 0.049                    |
| KHDRBS3      | 0.048                    |
| LTBP3        | 0.049                    |
| SCARA5       | 0.048                    |
| AC106786.1   | 0.048                    |
| CTD-3049M7.1 | 0.048                    |

1218 **Table S4. Differentially expressed genes (FDR-adjusted p-value<0.05) identified by**  
 1219 **ANOVA test using the pain-score percentile-based patient grouping.**

| Alternative gene prioritization approach          | P-value of correlation test between top 815-gene module summary score and pain score |         |          |
|---------------------------------------------------|--------------------------------------------------------------------------------------|---------|----------|
|                                                   | Kendall                                                                              | Pearson | Spearman |
| Kendall's correlation                             | 0.6509                                                                               | 0.5643  | 0.6905   |
| Pearson's correlation                             | 0.6107                                                                               | 0.8613  | 0.7053   |
| Spearman's correlation                            | 0.9099                                                                               | 0.446   | 0.8083   |
| ANOVA test (quantile-based patient grouping)      | 0.7343                                                                               | 0.9247  | 0.6979   |
| ANOVA test (33-percentile-based patient grouping) | 0.4284                                                                               | 0.5960  | 0.3686   |
| ANOVA test (mean/stdev-based patient grouping)    | 0.7343                                                                               | 0.7613  | 0.8375   |

1220 **Table S5. Correlation tests between the top 815-gene modules identified by GbGMI using**  
 1221 **different alternative gene prioritization approaches as alternatives to our Laplacian-Score**

1222 **approach and the pain score.** The p-values of Kendall's, Pearson's, and Spearman's correlation  
1223 tests between the top 815-gene module summary scores yielded by the different gene  
1224 prioritization approaches and the pain score are presented.

1225

1226
